# Supplementary material for: Transition metal/Brønsted acid cooperative catalysis enabled facile synthesis of 8-hydroxyquinolines through one-pot reactions of ortho-aminophenol, aldehydes and alkynes
Source: Royal Society of Chemistry journal article supplement (doi:10.1039/c8ra07212d), 2018-01-01

## *Supporting Information*

### **Transition Metal/Brønsted Acid Cooperative Catalysis Enabled Facile Synthesis of 8-hydroxyquinolines through One-pot Reactions of *ortho*-Aminophenol, Aldehydes and Alkynes**

Shuyan Yu\*<sup>1</sup>, Jingxin Wu<sup>1</sup>, Hongbing Lan<sup>1</sup>, Hanwen Xu<sup>1</sup>, Xiaofei Shi<sup>1</sup>, Xuewen  
Zhu\*<sup>1</sup>, Zhigang Yin\*<sup>1</sup>

1. Material and Chemical Engineering College, Zhengzhou University of Light  
Industry, Zhengzhou 450002, Henan, People's Republic of China

#### Table of contents

1. Characterization data of 8-hydroxyquinolines compounds.....1-6
2. <sup>1</sup>H and <sup>13</sup>C NMR spectra of 8-hydroxyquinolines compounds.....7-28

## 1. Characterization data of 8-hydroxyquinoline compounds

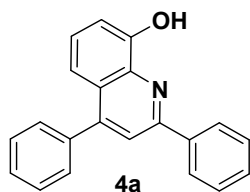

Light yellow solid; m.p.107-109°C; <sup>1</sup>H NMR (600 MHz, CDCl<sub>3</sub>): δ 8.60 (s, 1H), 8.19-8.21 (m, 2H), 7.87 (s, 1H), 7.49-7.59 (m, 8H), 7.40-7.41 (m, 2H), 7.23 (d, *J* = 8.7 Hz, 1H) ppm; <sup>13</sup>C NMR (150 MHz, CDCl<sub>3</sub>): δ 152.0, 150.2, 147.3, 136.4, 136.2, 135.9, 127.2, 127.1, 126.5, 126.2, 126.2, 125.0, 125.0, 123.6, 117.5, 113.6, 107.6 ppm.

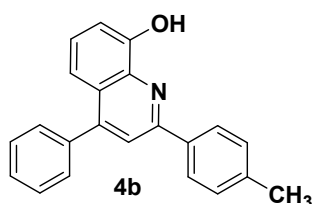

Light yellow solid; m.p.116-117°C; <sup>1</sup>H NMR (600 MHz, CDCl<sub>3</sub>): δ 8.60 (s, 1H), 8.10 (d, *J* = 8.2 Hz, 2H), 7.85 (s, 1H), 7.58 (dd, *J* = 11.4, 4.4 Hz, 5H), 7.34-7.39 (m, 4H), 7.21 (dd, *J* = 6.1, 2.6 Hz, 1H), 2.46 (s, 3H) ppm; <sup>13</sup>C NMR (150 MHz, CDCl<sub>3</sub>): δ 153.4, 151.4, 148.5, 138.7, 137.5, 137.3, 134.9, 128.6, 128.4, 127.5, 127.5, 126.2, 126.1, 124.8, 118.7, 114.9, 108.8, 20.3 ppm.

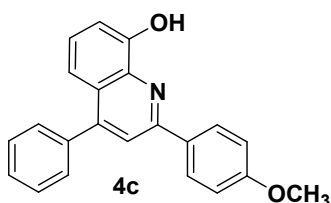

Light yellow solid; m.p.114-117°C; <sup>1</sup>H NMR (600 MHz, CDCl<sub>3</sub>): δ 8.59 (s, 1H), 8.16 (d, *J* = 8.9 Hz, 2H), 7.81 (s, 1H), 7.51-7.58 (m, 5H), 7.36-7.37 (m, 2H), 7.20 (dd, *J* = 6.3, 2.4 Hz, 1H), 7.05 (d, *J* = 8.9 Hz, 2H), 3.90 (s, 3H) ppm; <sup>13</sup>C NMR (100 MHz, CDCl<sub>3</sub>): δ 161.1, 154.1, 152.4, 149.6, 138.6, 138.4, 131.3, 129.5, 128.8, 128.6, 128.5, 126.9, 125.7, 119.5, 116.0, 114.3, 109.9, 55.4 ppm.

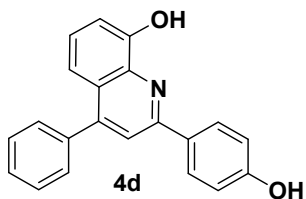

Orange solid; m.p.: 185-187°C; <sup>1</sup>H NMR (400 MHz, CDCl<sub>3</sub>): δ 8.11 (d, *J* = 8.5 Hz, 2H), 7.79 (s, 1H), 7.53 (dd, *J* = 14.1, 6.7 Hz, 5H), 7.31-7.40 (m, 2H), 7.19 (dd, *J* = 5.8, 2.6 Hz, 1H), 6.99 (d, *J* = 8.5 Hz, 2H) ppm; <sup>13</sup>C NMR (100 MHz, CDCl<sub>3</sub>): δ 157.2, 154.0, 152.3, 149.6, 138.5, 138.3, 129.5, 129.0, 128.6, 127.0, 125.7, 119.5, 116.1, 115.8, 109.9 ppm.

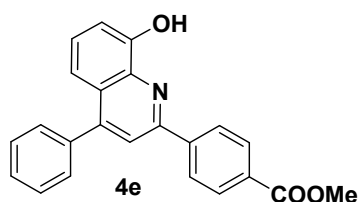

Light yellow solid; m.p.206-208°C; <sup>1</sup>H NMR (600 MHz, CDCl<sub>3</sub>) δ 8.51 (s, 1H), 8.25 (d, *J* = 8.3 Hz, 2H),

8.19 (d,  $J = 8.4$  Hz, 2H), 7.88 (s, 1H), 7.55 (m, 5H), 7.41 (d,  $J = 6.5$  Hz, 2H), 7.23 (dd,  $J = 6.1, 2.5$  Hz, 1H), 3.97 (s, 3H) ppm;  $^{13}\text{C}$  NMR (100 MHz,  $\text{CDCl}_3$ ):  $\delta$  166.8, 153.1, 152.6, 150.0, 142.8, 138.6, 138.0, 130.9, 130.1, 129.5, 128.7, 128.6, 128.0, 127.3, 126.3, 119.9, 116.1, 110.3, 52.3 ppm.

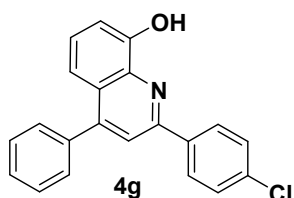

Light yellow solid; m.p.148-149°C;  $^1\text{H}$  NMR (400 MHz,  $\text{CDCl}_3$ ):  $\delta$  8.51 (s, 1H), 8.16 (d,  $J = 8.6$  Hz, 2H), 7.84 (s, 1H), 7.52-7.61 (m, 7H), 7.41-7.45 (m, 2H), 7.25 (dd,  $J = 5.1, 3.6$  Hz, 1H) ppm;  $^{13}\text{C}$  NMR (150 MHz,  $\text{CDCl}_3$ ):  $\delta$  152.1, 151.4, 148.9, 137.5, 137.02, 136.1, 134.8, 128.4, 128.0, 127.6, 126.5, 125.0, 118.4, 115.0, 109.1 ppm.

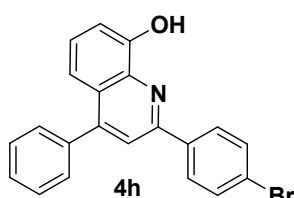

Light yellow solid; m.p.163-164°C;  $^1\text{H}$  NMR (600 MHz,  $\text{CDCl}_3$ )  $\delta$  8.49 (s, 1H), 8.06 (d,  $J = 8.3$  Hz, 2H), 7.81 (s, 1H), 7.66 (d,  $J = 8.2$  Hz, 2H), 7.55 (d,  $J = 5.4$  Hz, 5H), 7.40 (d,  $J = 6.0$  Hz, 2H), 7.21 (d,  $J = 2.4$  Hz, 1H) ppm;  $^{13}\text{C}$  NMR (150 MHz,  $\text{CDCl}_3$ ):  $\delta$  153.2, 152.5, 150.0, 138.5, 138.1, 137.6, 132.1, 129.5, 128.9, 128.7, 128.7, 127.7, 126.1, 119.5, 116.1, 110.2 ppm.

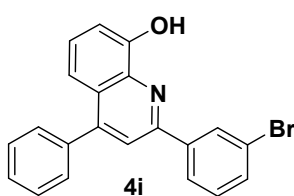

Light yellow solid; m.p.153-154°C;  $^1\text{H}$  NMR (600 MHz,  $\text{CDCl}_3$ ):  $\delta$  8.48 (s, 1H), 8.34 (t,  $J = 1.6$  Hz, 1H), 8.10 (d,  $J = 7.8$  Hz, 1H), 7.81 (s, 1H), 7.62 (d,  $J = 8.0$  Hz, 1H), 7.56-7.57 (m, 3H), 7.52-7.54(m, 1H), 7.41 (dd,  $J = 8.8, 6.2$  Hz, 3H), 7.23 (dd,  $J = 6.0, 2.7$  Hz, 1H) ppm;  $^{13}\text{C}$  NMR (100 MHz,  $\text{CDCl}_3$ ):  $\delta$  152.8, 152.6, 150.1, 140.8, 138.6, 138.1, 132.5, 130.4, 129.5, 128.7, 127.8, 126.2, 125.9, 123.2, 119.7, 116.1, 110.3 ppm.

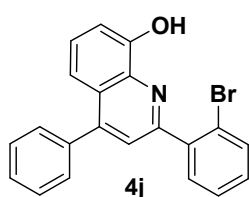

Light yellow oil;  $^1\text{H}$  NMR (600 MHz,  $\text{CDCl}_3$ ):  $\delta$  8.48 (s, 1H), 7.71-7.75 (m, 2H), 7.70 (dd,  $J = 7.6, 1.6$  Hz, 1H), 7.59-7.61 (m, 2H), 7.47-7.55 (m, 3H), 7.32-7.35 (m, 3H), 7.24 (td,  $J = 7.8, 1.7$

Hz, 1H), 7.23 (dd,  $J = 7.1, 1.5$  Hz, 1H) ppm;  $^{13}\text{C}$  NMR (100 MHz,  $\text{CDCl}_3$ ):  $\delta$  155.7, 152.7, 148.6, 140.8, 138.5, 138.0, 133.6, 131.9, 130.2, 129.6, 128.7, 128.0, 127.7, 125.9, 123.6, 121.9, 116.0, 110.1 ppm.

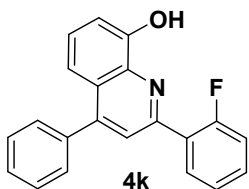

Light yellow solid; m.p.120-121°C;  $^1\text{H}$  NMR (600 MHz,  $\text{CDCl}_3$ ):  $\delta$  8.51 (s, 1H), 8.12 (t,  $J = 7.6$  Hz, 1H), 7.90 (s, 1H), 7.50-7.6 0 (m, 5H), 7.41-7.47 (m, 3H), 7.34 (t,  $J = 7.5$  Hz, 1H), 7.22 (dd,  $J = 12.4, 6.8$  Hz, 2H) ppm;  $^{13}\text{C}$  NMR (100 MHz,  $\text{CDCl}_3$ ):  $\delta$  162.1, 159.6, 152.6, 151.2, 149.2, 131.4, 129.6, 128.6, 127.8, 124.7, 116.6, 116.4, 116.0, 109.9, 100.0 ppm.

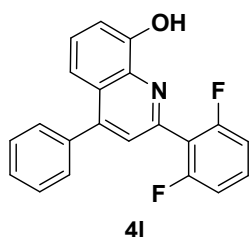

Green oil;  $^1\text{H}$  NMR (600 MHz,  $\text{CDCl}_3$ ):  $\delta$  8.43 (s, 1H), 7.57-7.59 (m, 3H), 7.50-7.55 (m, 3H), 7.44 (dd,  $J = 21.1, 6.5$  Hz, 4H), 7.23 (t,  $J = 4.4$  Hz, 1H), 7.07 (t,  $J = 8.0$  Hz, 2H) ppm;  $^{13}\text{C}$  NMR (100 MHz,  $\text{CDCl}_3$ ):  $\delta$  162.0, 161.9, 159.5, 159.4, 152.6, 149.1, 147.0, 138.7, 137.8, 129.6, 128.6, 128.3, 124.2, 116.0, 112.1, 112.0, 111.9, 111.8, 110.0 ppm.

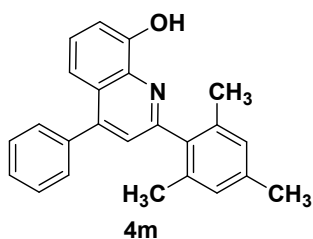

Brown solid; m.p.142°C-143°C;  $^1\text{H}$  NMR (600 MHz,  $\text{CDCl}_3$ )  $\delta$  7.55-7.58(m, 2H), 7.53 (t,  $J = 7.3$  Hz, 2H), 7.47-7.51 (m, 2H), 7.41-7.45 (m, 1H), 7.35 (s, 1H), 7.19-7.22 (m, 1H), 7.01 (s, 2H), 2.37 (s, 3H), 2.11 (s, 6H) ppm;  $^{13}\text{C}$  NMR (150 MHz,  $\text{CDCl}_3$ ):  $\delta$ 156.6, 151.5, 147.9, 137.0, 136.9, 134.8, 128.5, 127.5, 127.5, 127.4 126.4, 124.4, 108.7, 20.1, 19.3 ppm.

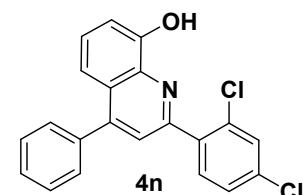

White solid; m.p.132-133°C;  $^1\text{H}$  NMR (600 MHz,  $\text{CDCl}_3$ )  $\delta$  8.40 (s, 1H), 7.70-7.74 (m, 2H), 7.57 (dd,  $J = 12.5, 7.4$  Hz, 6H), 7.45-7.46 (m, 2H), 7.43 (dd,  $J = 9.1\text{Hz}, 1.1$  Hz, 1H), 7.23 (dd,  $J = 5.6\text{Hz}, 2.5$  Hz, 1H) ppm;  $^{13}\text{C}$  NMR (150 MHz,

CDCl<sub>3</sub>):  $\delta$  153.2, 152.5, 148.8, 138.5, 137.8, 135.4, 133.2, 132.7, 130.1, 129.5, 128.6, 128.1, 127.5, 125.9, 123.3, 116.0, 110.1 ppm.

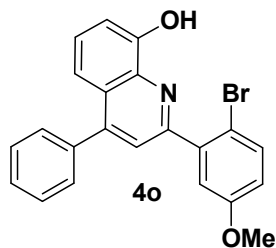

White solid; m.p.166-168°C; <sup>1</sup>H NMR (400 MHz, CDCl<sub>3</sub>)  $\delta$  8.41 (d, *J* = 1.9 Hz, 1H), 8.15 (d, *J* = 10.4 Hz, 1H), 7.80 (s, 1H), 7.54-7.62 (m, 5H), 7.41 (d, *J* = 4.3 Hz, 2H), 7.24 (t, *J* = 4.3 Hz, 1H), 7.06 (d, *J* = 8.6 Hz, 1H), 4.02 (s, 3H) ppm; <sup>13</sup>C NMR (100 MHz, CDCl<sub>3</sub>):  $\delta$  159.1, 155.6, 152.7, 148.6, 141.6, 138.4, 138.0, 134.3, 129.6, 128.6, 128.0, 126.0, 123.6, 117.1, 116.3, 116.0, 112.3, 110.0, 55.7 ppm.

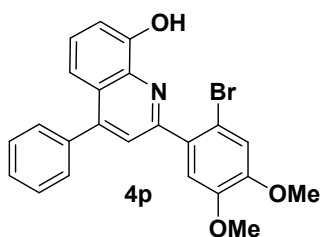

Brown oil; <sup>1</sup>H NMR (600 MHz, CDCl<sub>3</sub>)  $\delta$  8.46 (s, 1H), 7.75 (s, 1H), 7.58-7.60(m, 2H), 7.54 (t, *J*=7.3 Hz, 2H), 7.51 (d, *J* =7.2 Hz, 1H), 7.41-7.46 (m, 2H), 7.24 (s, 1H), 7.22 (dd, *J* =7.0, 1.6 Hz, 1H), 7.18 (s, 1H), 3.95 (d, *J* =11.0 Hz, 6H) ppm; <sup>13</sup>C NMR (100 MHz, CDCl<sub>3</sub>):  $\delta$  155.5, 152.6, 150.1, 148.7, 148.4, 138.0, 129.6, 128.6, 127.8, 125.8, 123.8, 116.2, 116.0, 114.3, 112.3, 110.0, 56.4, 56.3 ppm.

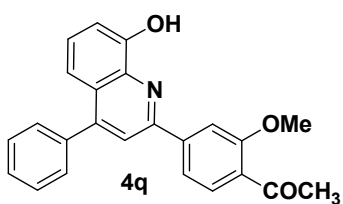

White solid; m.p.205-208°C; <sup>1</sup>H NMR (600 MHz, CDCl<sub>3</sub>)  $\delta$  8.51 (s, 1H), 7.81-7.82(m, 2H), 7.72 (dd, *J* = 8.2, 1.9 Hz, 1H), 7.52-7.57 (m, 5H), 7.36-7.41(m, 2H), 7.19-7.23 (m, 2H), 3.98 (s, 3H), 2.37 (s, 3H) ppm; <sup>13</sup>C NMR (100 MHz, CDCl<sub>3</sub>):  $\delta$  169.0, 153.8, 152.5, 151.6, 149.9, 141.2, 138.2, 137.8, 129.5, 128.7, 126.1, 123.2, 120.1, 119.9, 116.8, 111.5, 110.1, 56.2, 20.7 ppm.

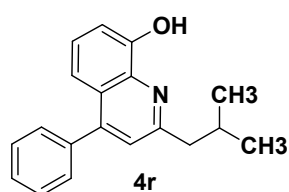

Light yellow oil; <sup>1</sup>H NMR (600 MHz, CDCl<sub>3</sub>)  $\delta$  7.46-7.52 (m, 5H), 7.32-37(m, 2H), 7.23 (s, 1H), 7.15 (d, *J* = 7.0 Hz, 1H), 2.85 (d, *J* = 7.2 Hz, 2H), 2.27 (dt, *J* = 13.5, 6.7 Hz, 1H), 1.00 (d, *J* = 6.6 Hz, 6H) ppm; <sup>13</sup>C NMR (150MHz, CDCl<sub>3</sub>):  $\delta$

158.8, 151.4, 148.2, 137.6, 137.5, 128.9, 127.8, 127.7, 125.9, 124.7, 122.4, 47.1, 29.2, 28.5, 21.9 ppm.

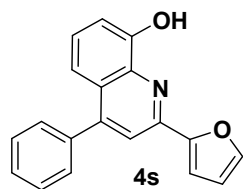

Light yellow solid; m.p.132-133°C;  $^1\text{H}$  NMR (600 MHz,  $\text{CDCl}_3$ )  $\delta$  8.41 (s, 1H), 7.75 (s, 1H), 7.51 (s, 1H), 7.41-7.48 (m, 7H), 7.27 (d,  $J = 2.6$  Hz, 2H), 7.17-7.19 (m, 2H), 7.10 (dd,  $J = 5.9, 2.7$  Hz, 1H), 6.52 (dd,  $J = 3.4, 1.7$  Hz, 1H) ppm;  $^{13}\text{C}$  NMR (100 MHz,  $\text{CDCl}_3$ ):  $\delta$  153.5, 152.2, 149.5, 146.4, 144.0, 138.5, 138.1, 129.5, 128.6, 127.2, 126.0, 118.2, 116.2, 112.4, 110.1, 110.8 ppm.

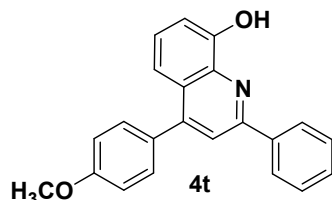

Light yellow solid; m.p.187-189°C;  $^1\text{H}$  NMR (600 MHz,  $\text{CDCl}_3$ )  $\delta$  8.54 (s, 1H), 8.18 (d,  $J = 7.6$  Hz, 2H), 7.83 (s, 1H), 7.51-7.55 (m, 4H), 7.48 (t,  $J = 7.3$  Hz, 1H), 7.44 (d,  $J = 8.4$  Hz, 1H), 7.38 (t,  $J = 7.9$  Hz, 1H), 7.20 (d,  $J = 7.4$  Hz, 1H), 7.07 (d,  $J = 8.5$  Hz, 2H), 3.91 (s, 3H) ppm;  $^{13}\text{C}$  NMR (100 MHz,  $\text{CDCl}_3$ ):  $\delta$  160.0, 154.5, 152.6, 149.4, 138.9, 130.7, 130.6, 129.6, 128.9, 127.4, 126.2, 119.9, 116.1, 114.1, 109.9, 55.5 ppm.

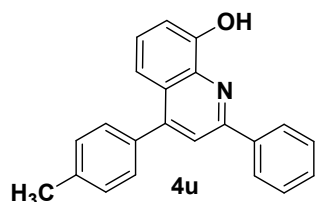

Light yellow solid; m.p.127-128°C;  $^1\text{H}$  NMR (600 MHz,  $\text{CDCl}_3$ )  $\delta$  8.60 (s, 1H), 8.17 (d,  $J = 7.4$  Hz, 2H), 7.84 (s, 1H), 7.53 (t,  $J = 7.6$  Hz, 2H), 7.45-7.63 (m, 3H), 7.42 (d,  $J = 7.7$  Hz, 1H), 7.33-7.39 (m, 3H), 7.20 (d,  $J = 7.3$  Hz, 1H), 2.47 (s, 3H) ppm;  $^{13}\text{C}$  NMR (100 MHz,  $\text{CDCl}_3$ ):  $\delta$  154.5, 152.6, 149.8, 138.9, 138.60, 135.4, 129.6, 129.5, 129.4, 128.9, 127.4, 127.3, 126.1, 119.9, 116.1, 109.9, 21.4 ppm.

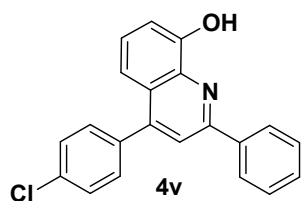

Light yellow solid; m.p.159-161°C;  $^1\text{H}$  NMR (400 MHz,  $\text{CDCl}_3$ )  $\delta$  8.62 (s, 1H), 8.21 (dd,  $J = 8.2, 1.3$  Hz, 2H), 7.85 (s, 1H), 7.52-7.61 (m, 7H), 7.41-7.47 (m, 1H), 7.37 (d,  $J = 7.2$  Hz, 1H), 7.25 (dd,  $J = 7.4, 1.3$  Hz, 1H) ppm;  $^{13}\text{C}$  NMR (150 MHz,  $\text{CDCl}_3$ ):  $\delta$  154.4, 152.5, 148.3, 138.5, 136.6, 134.7, 130.7, 129.7, 128.8, 127.6, 127.3, 125.7, 119.8, 115.5, 110.1 ppm.

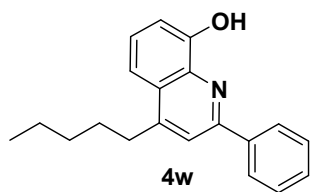

Light yellow oil;  $^1\text{H}$  NMR (600 MHz,  $\text{CDCl}_3$ )  $\delta$  8.61 (s, 1H), 8.13-8.16 (m, 2H), 7.73 (s, 1H), 7.41-7.55 (m, 5H), 7.17 (d,  $J = 8.5$  Hz, 1H), 3.06-3.10 (m, 2H), 1.80 (dt,  $J = 15.5, 7.7$  Hz, 2H), 1.36-1.47 (m, 5H), 1.25 (s, 1H), 0.92 (t,  $J = 7.2$  Hz, 3H) ppm;  $^{13}\text{C}$  NMR (100 MHz,  $\text{CDCl}_3$ ):  $\delta$  154.5, 152.9, 150.3, 139.1, 138.2, 129.5, 128.8, 127.4, 126.9, 119.1, 113.9, 109.7, 32.7, 31.9, 29.8, 22.6, 14.1 ppm.

## 2. <sup>1</sup>H and <sup>13</sup>C NMR spectra of 8-hydroxyquinoline compounds

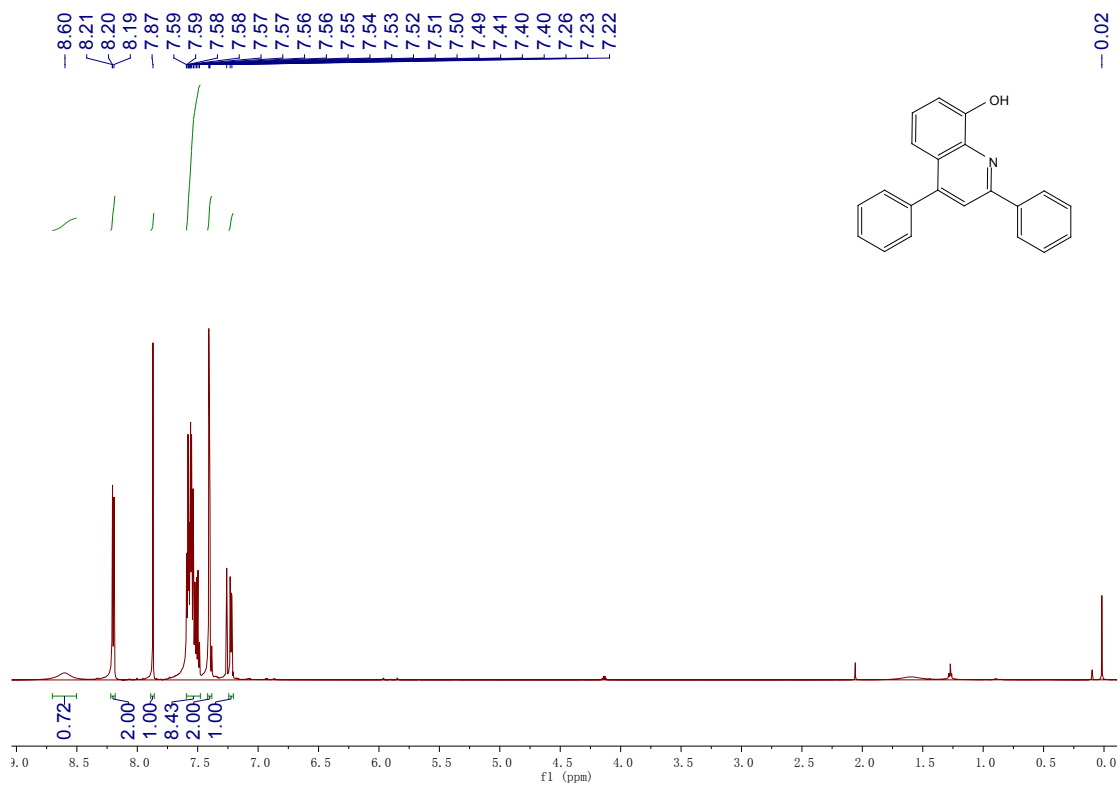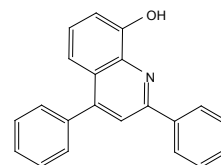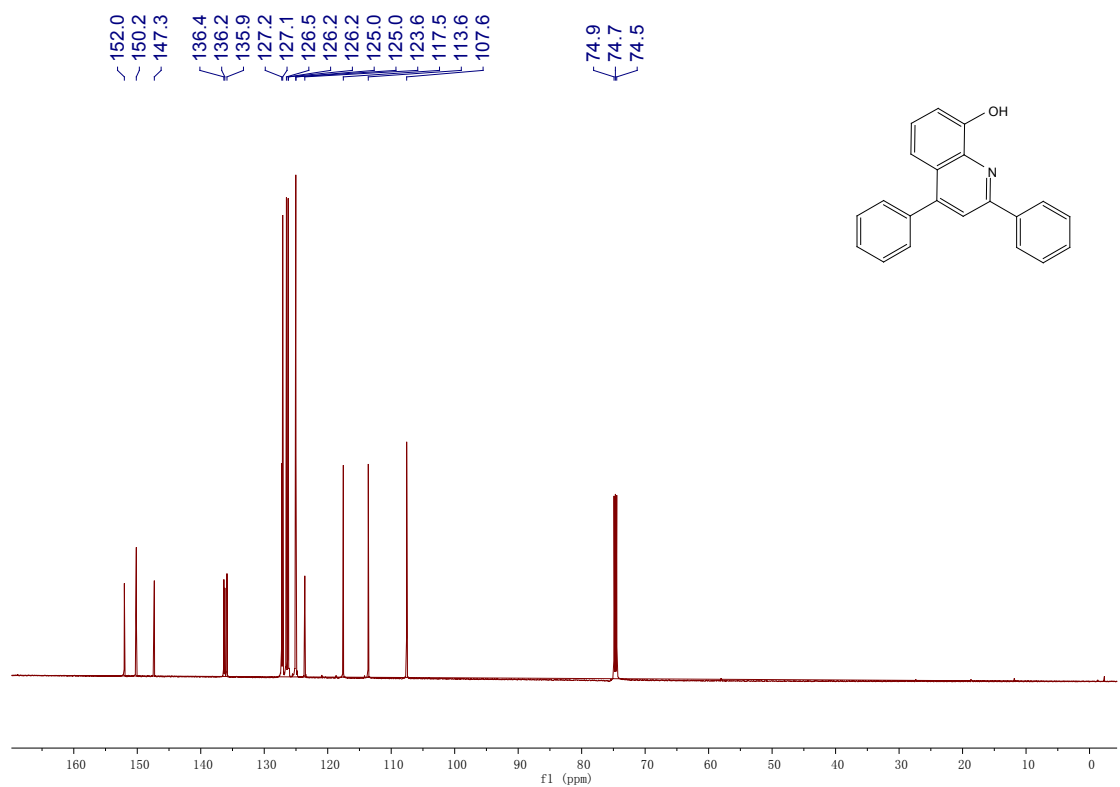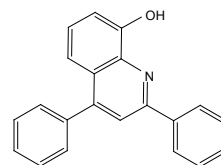



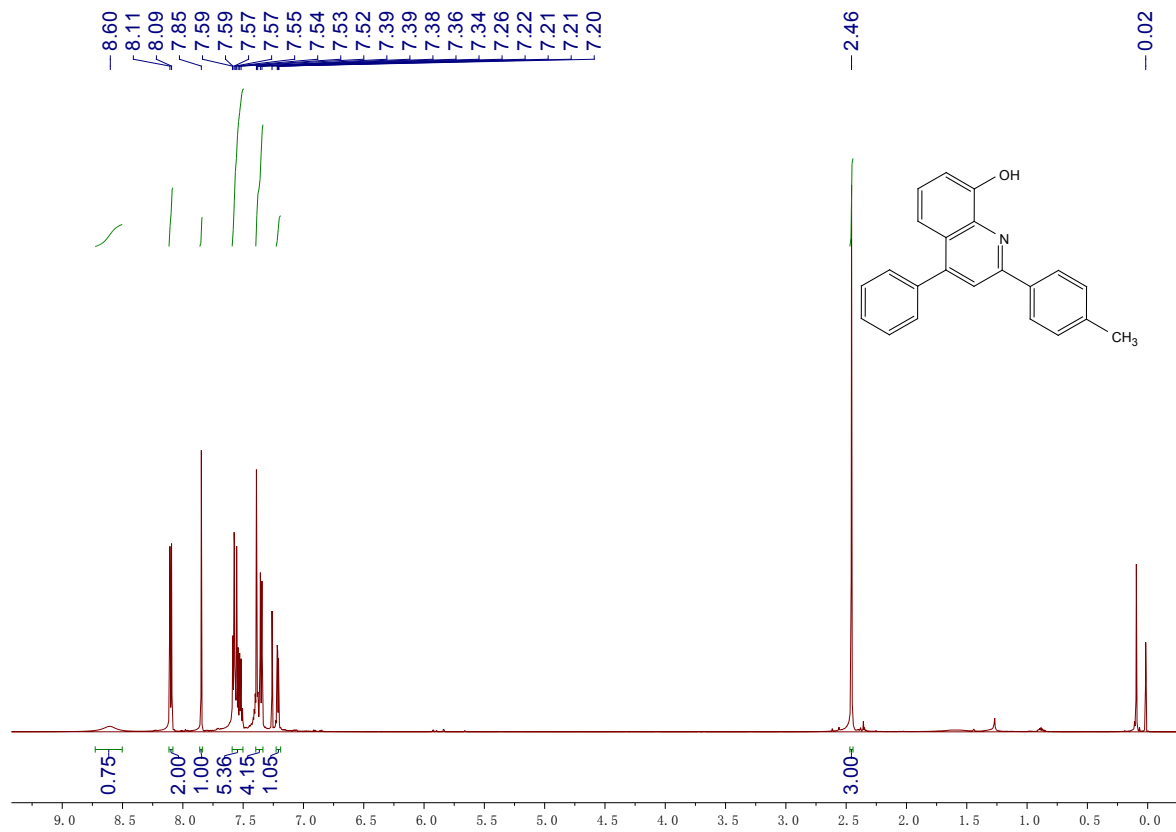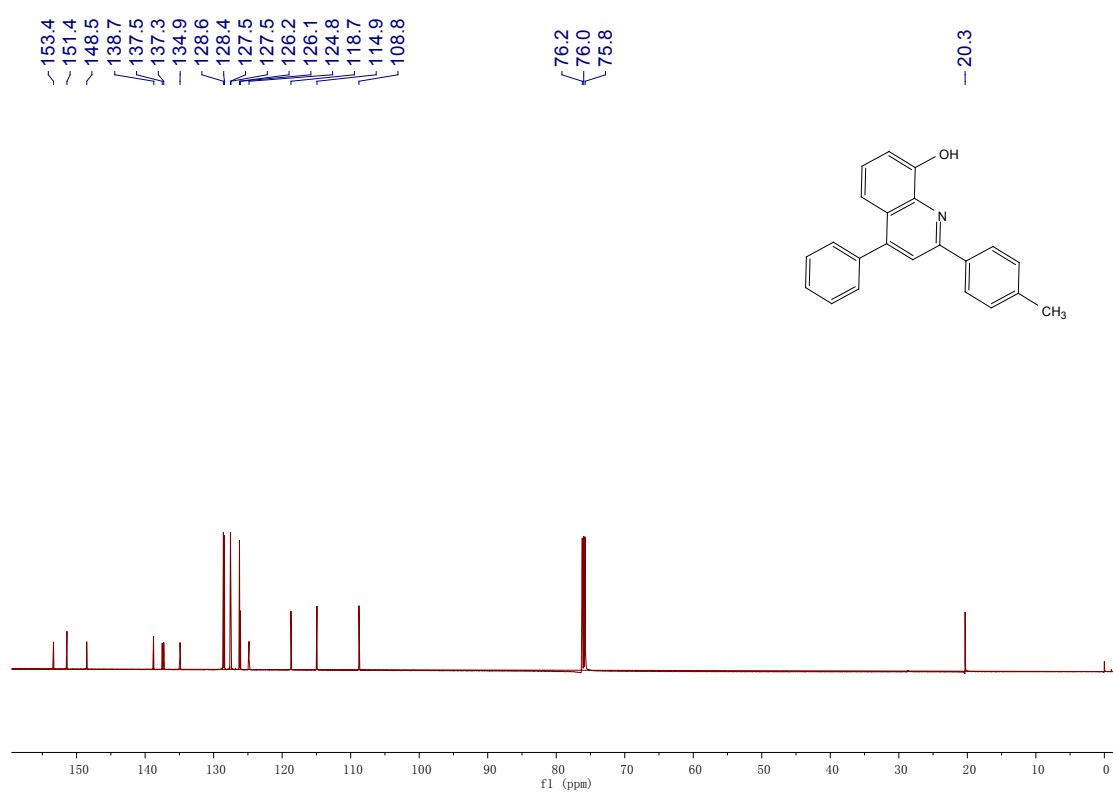

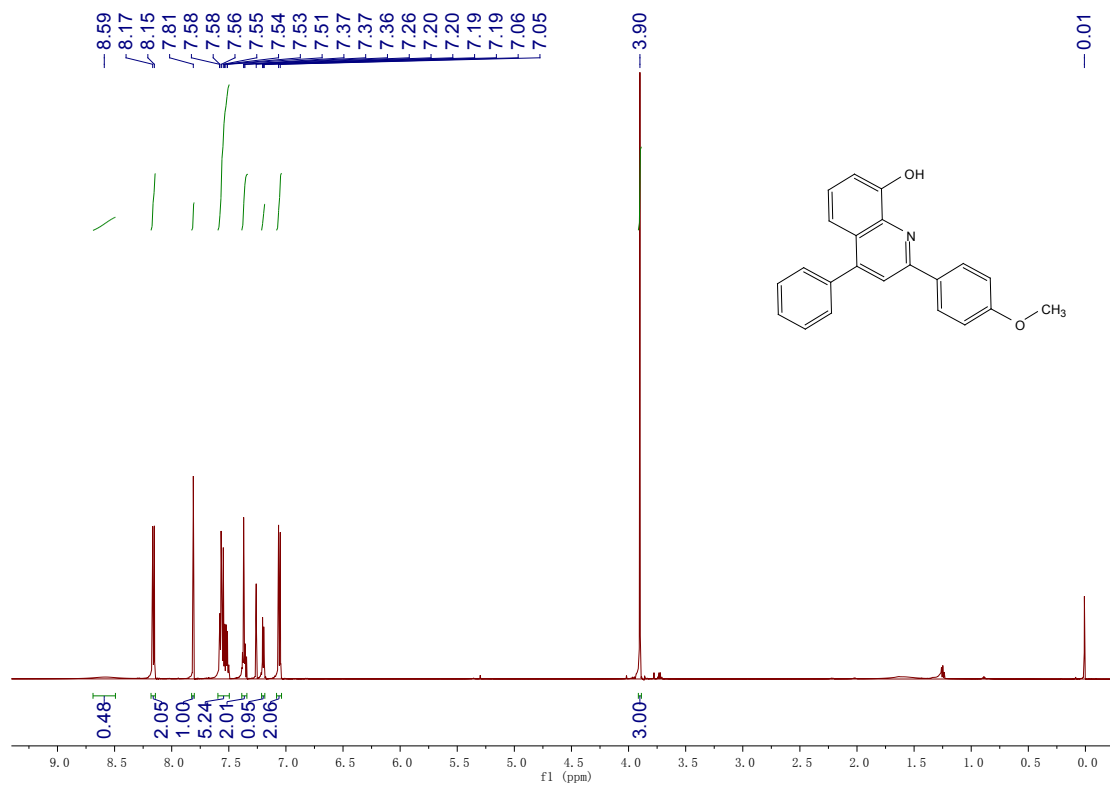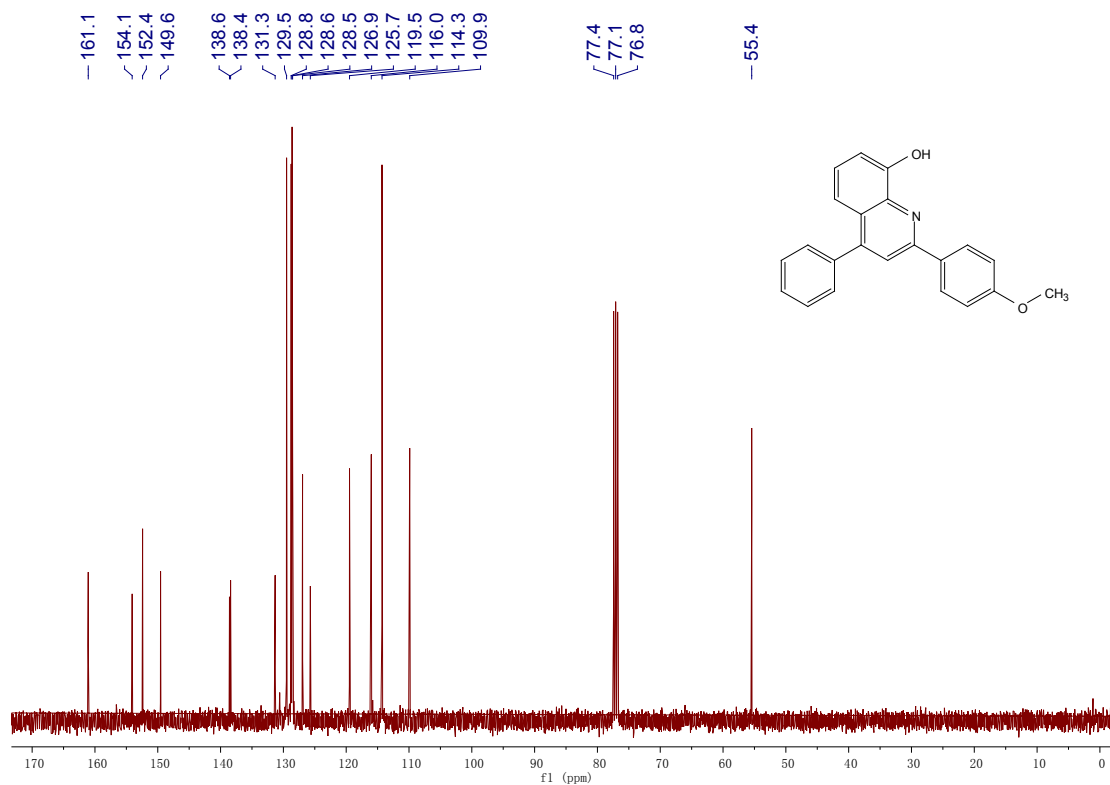

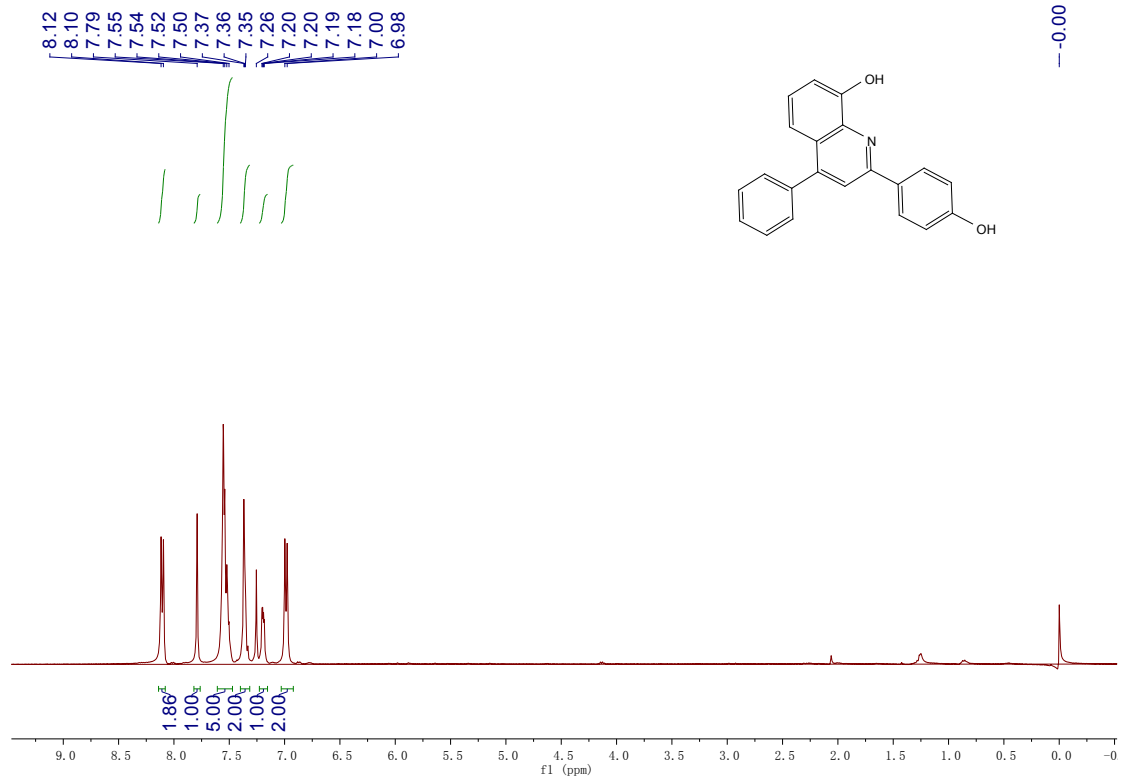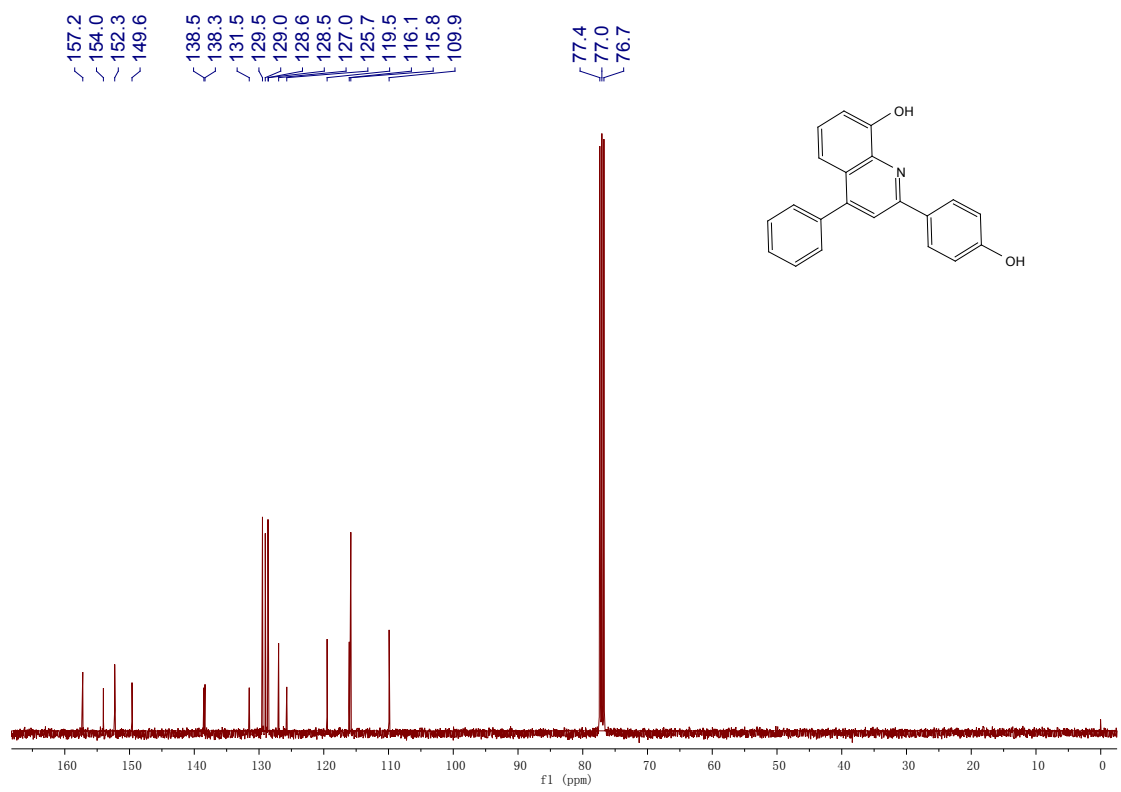

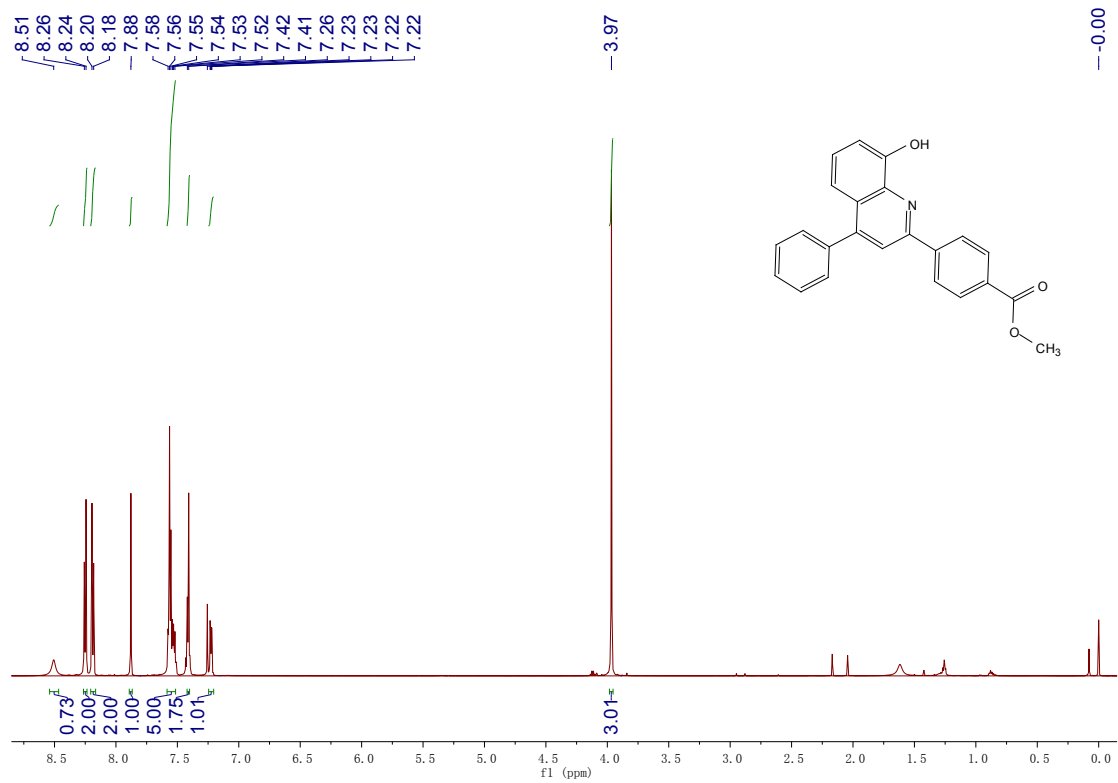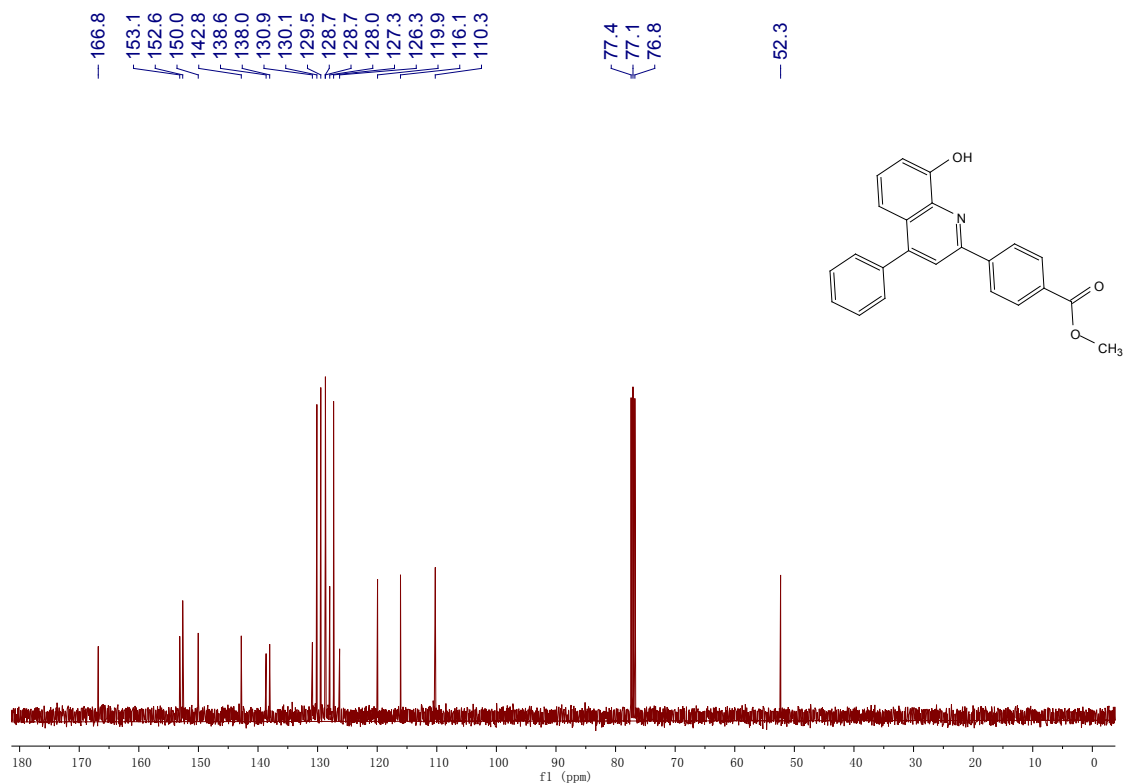

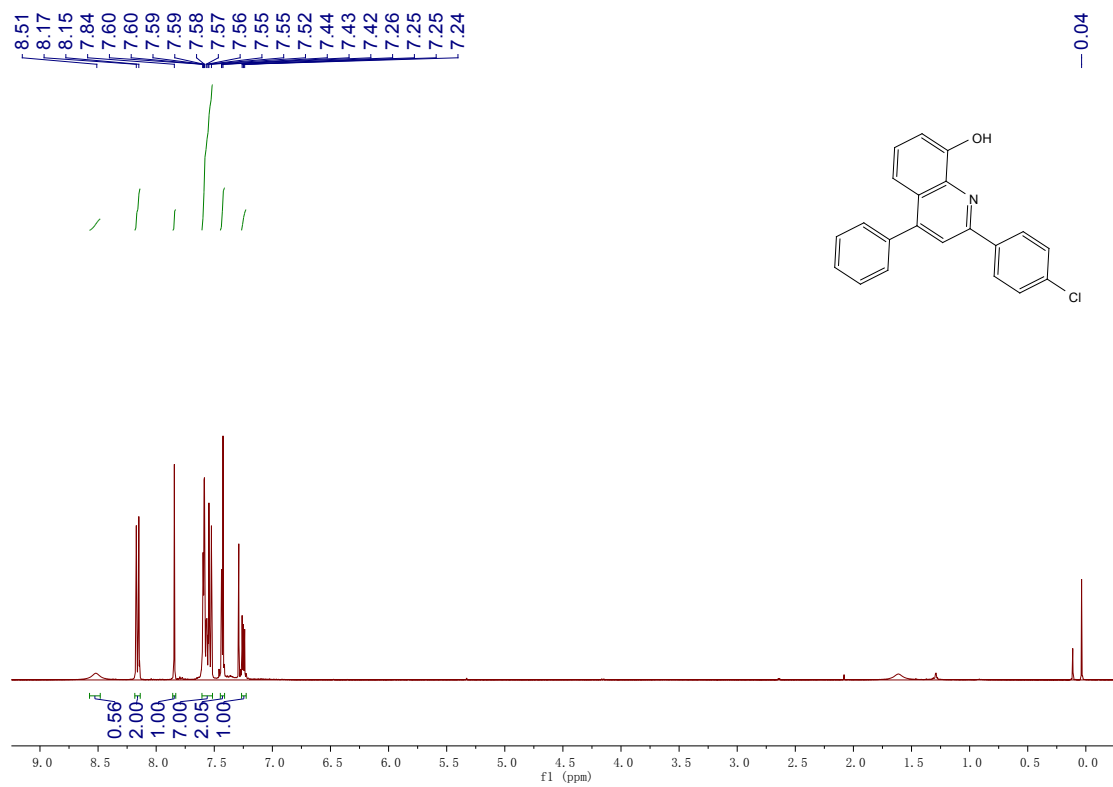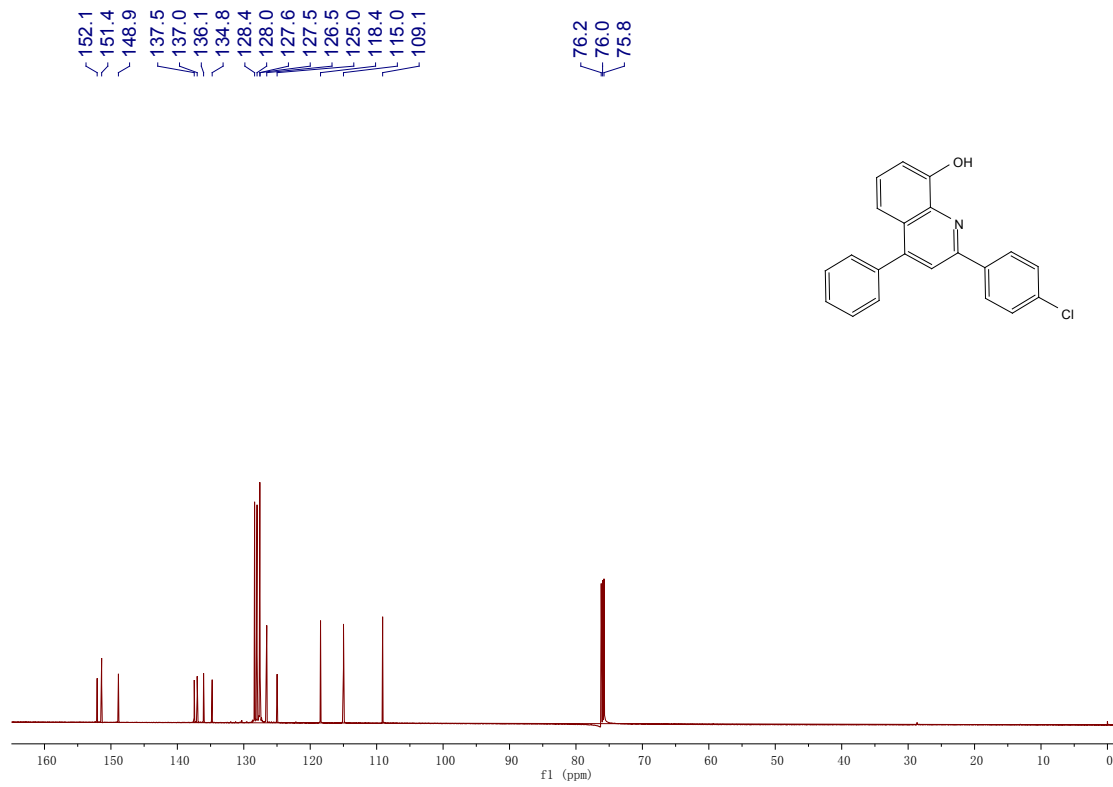

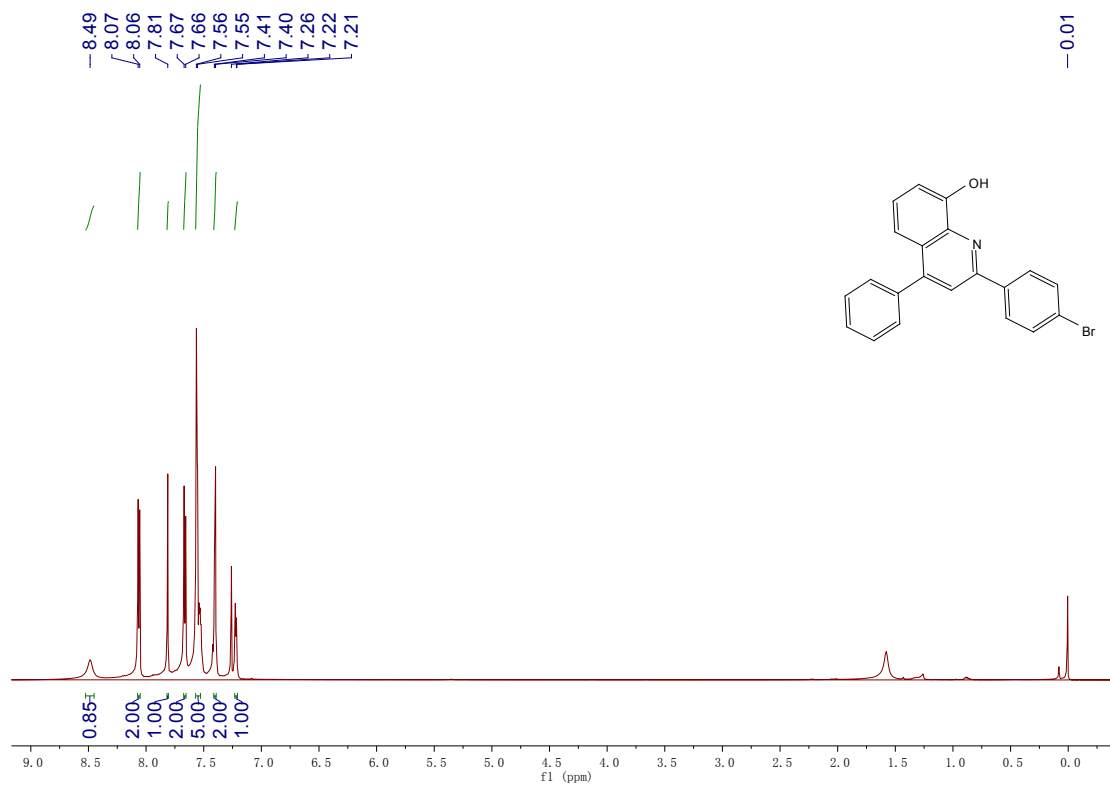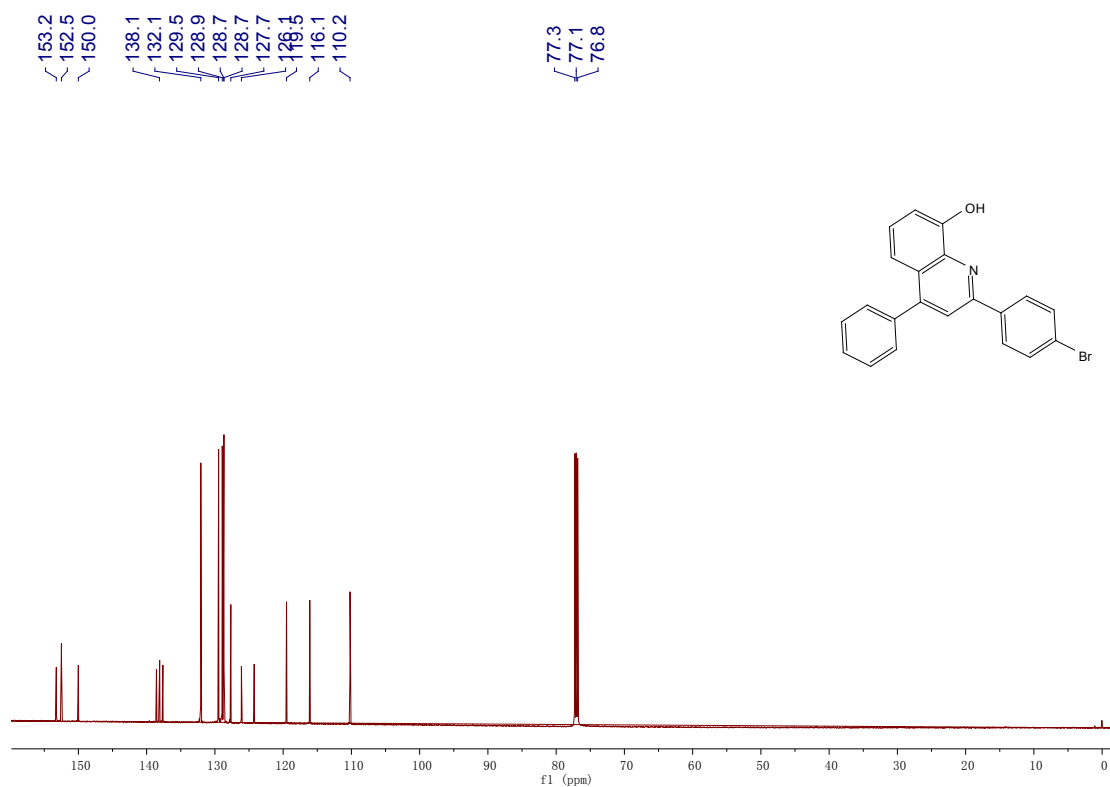

8.48  
8.34  
8.34  
8.34  
8.11  
8.09  
7.81  
7.62  
7.61  
7.57  
7.56  
7.56  
7.54  
7.54  
7.53  
7.53  
7.52  
7.42  
7.41  
7.41  
7.39  
7.26  
7.24  
7.23  
7.23  
7.22

0.01

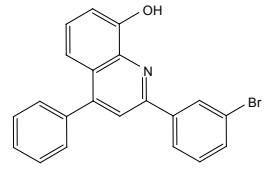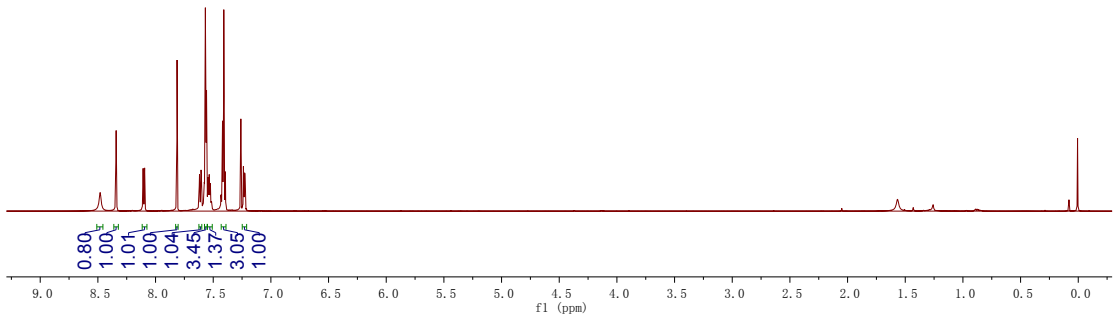

152.8  
152.6  
150.1  
140.8  
138.6  
138.0  
132.5  
130.4  
130.4  
129.5  
128.7  
128.7  
127.8  
126.2  
125.9  
123.2  
119.7  
116.1  
110.3

77.4  
77.1  
76.8

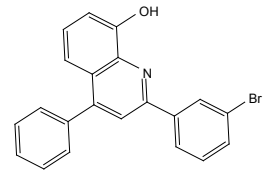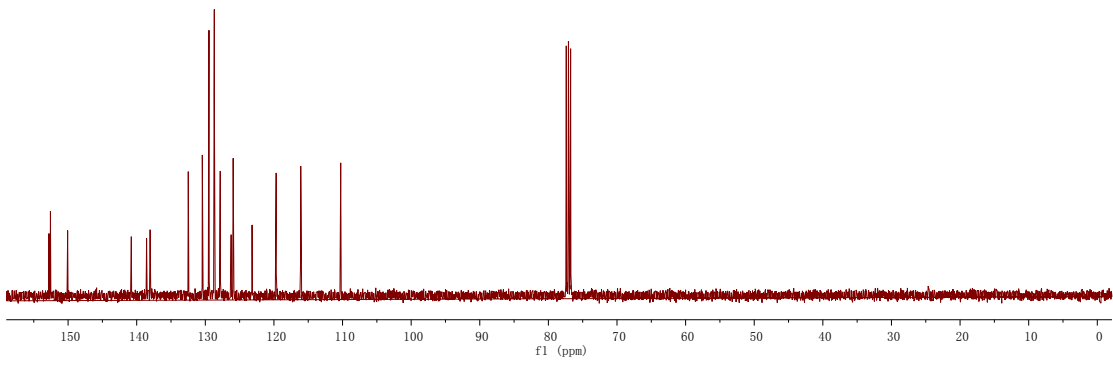

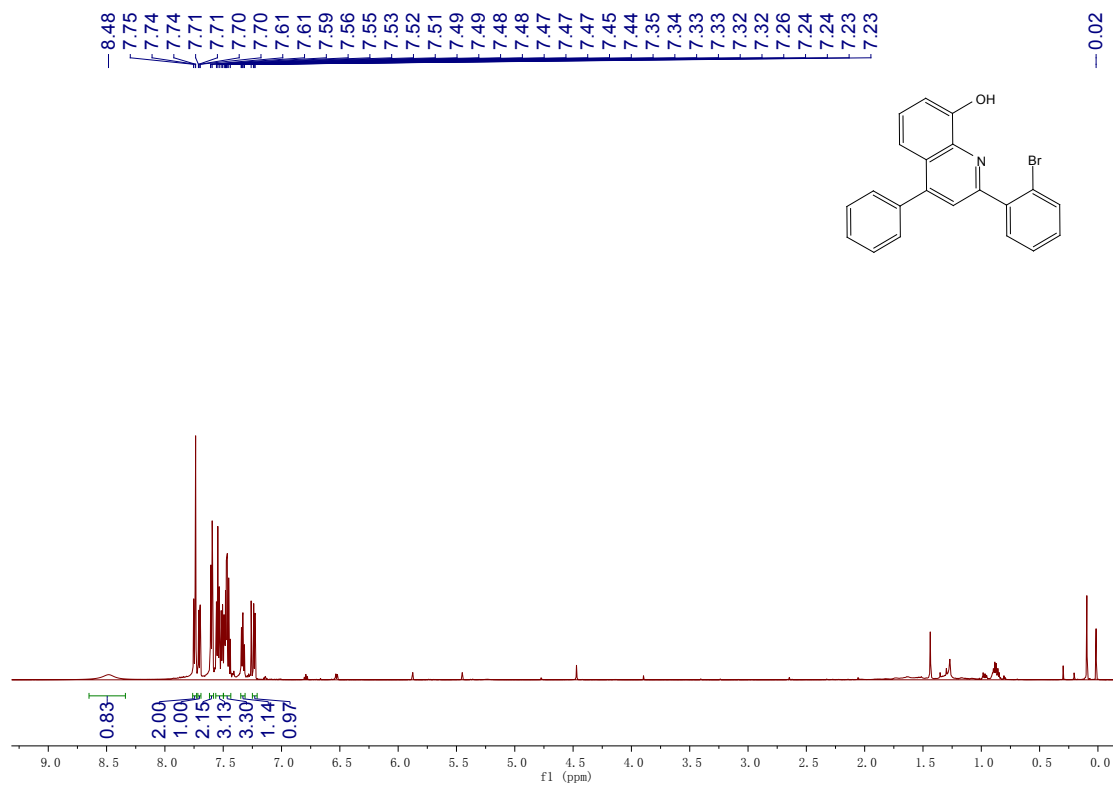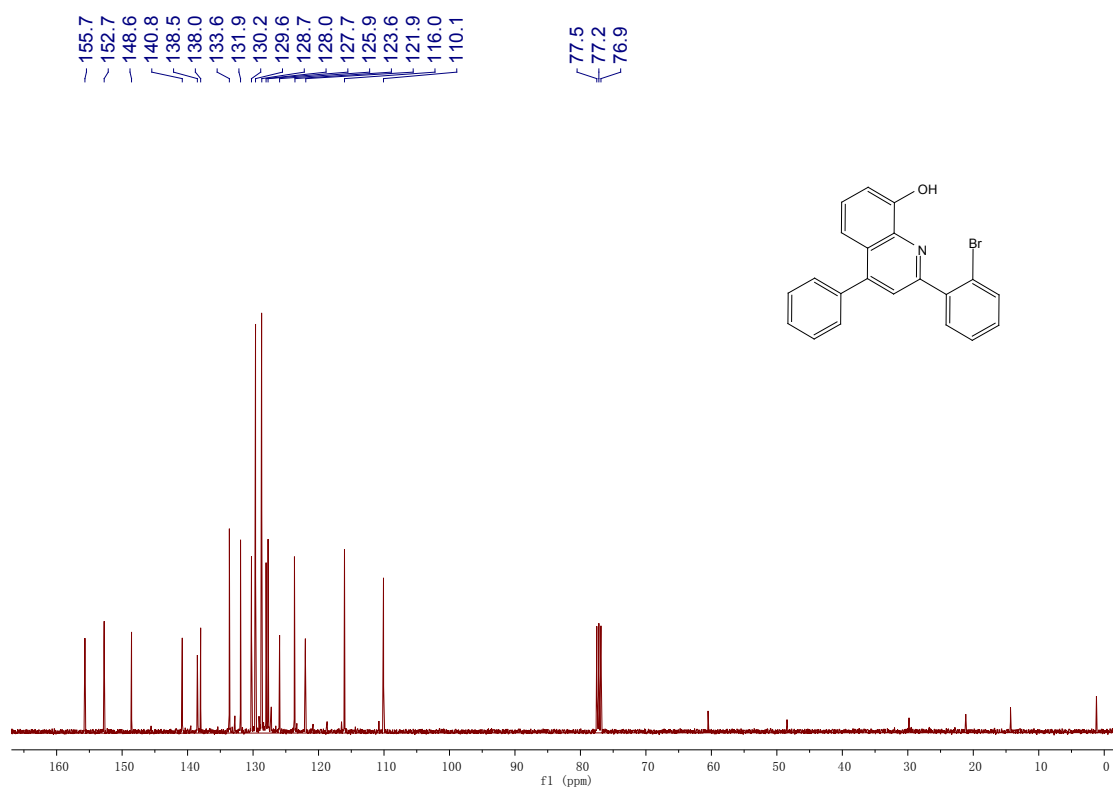



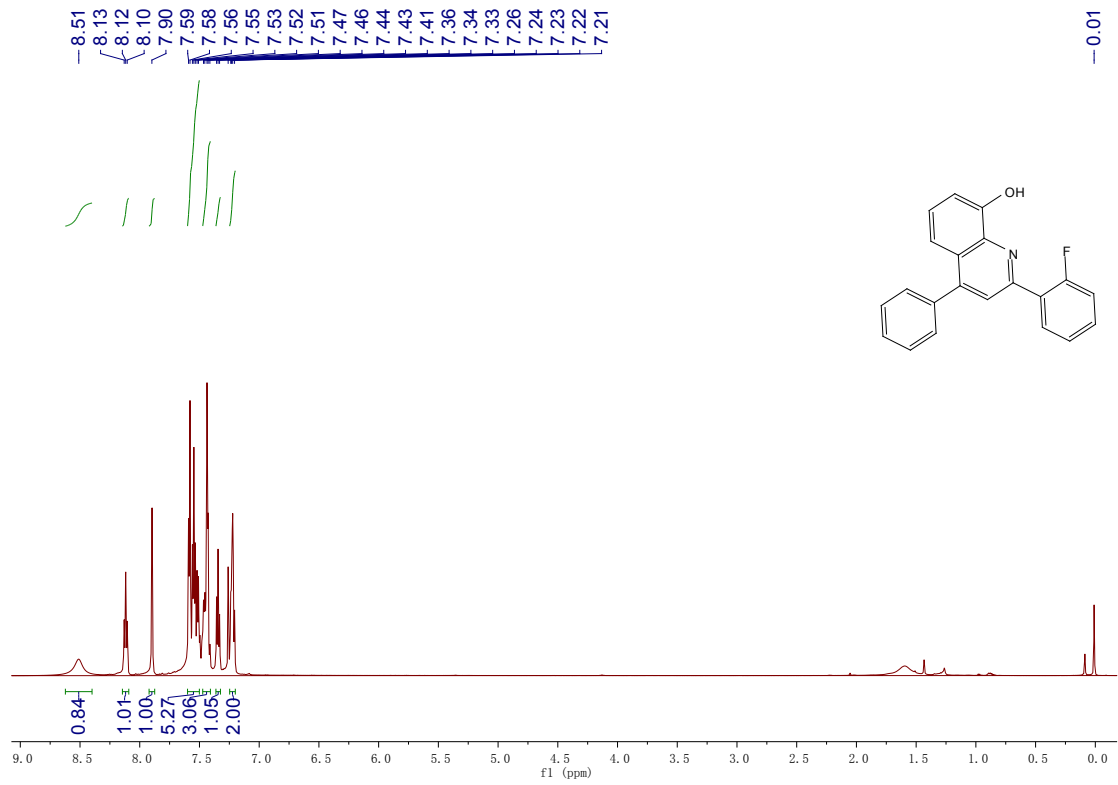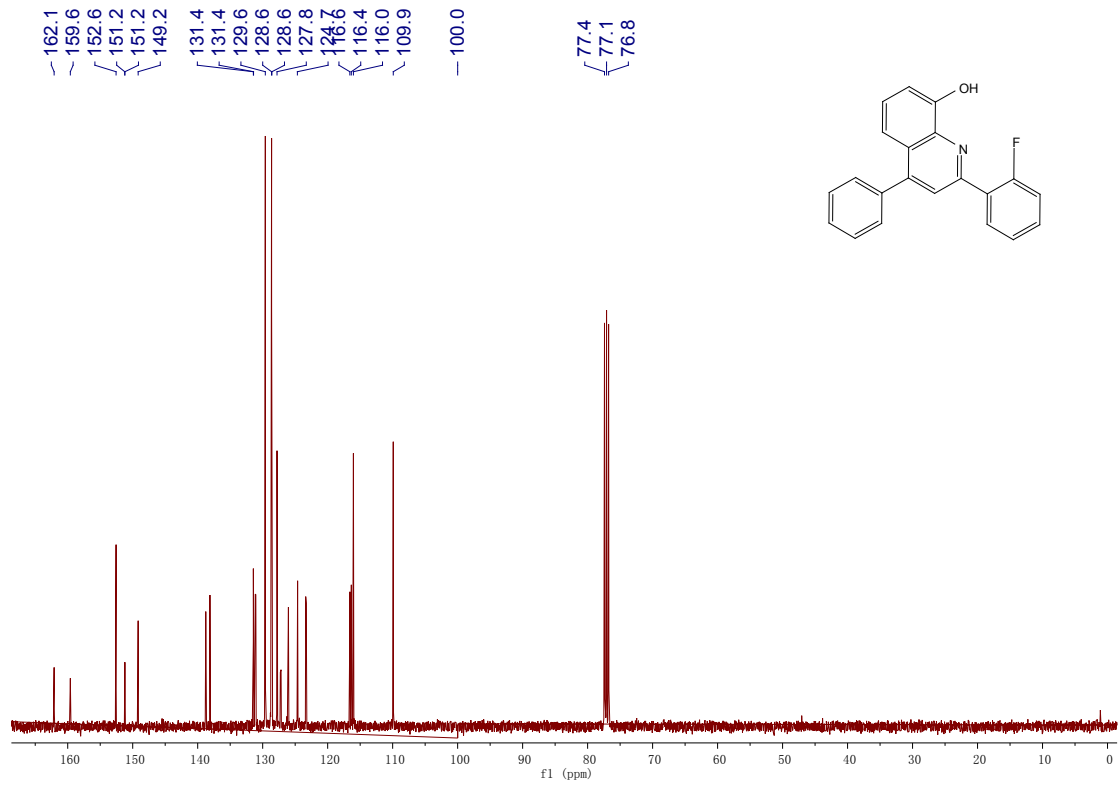

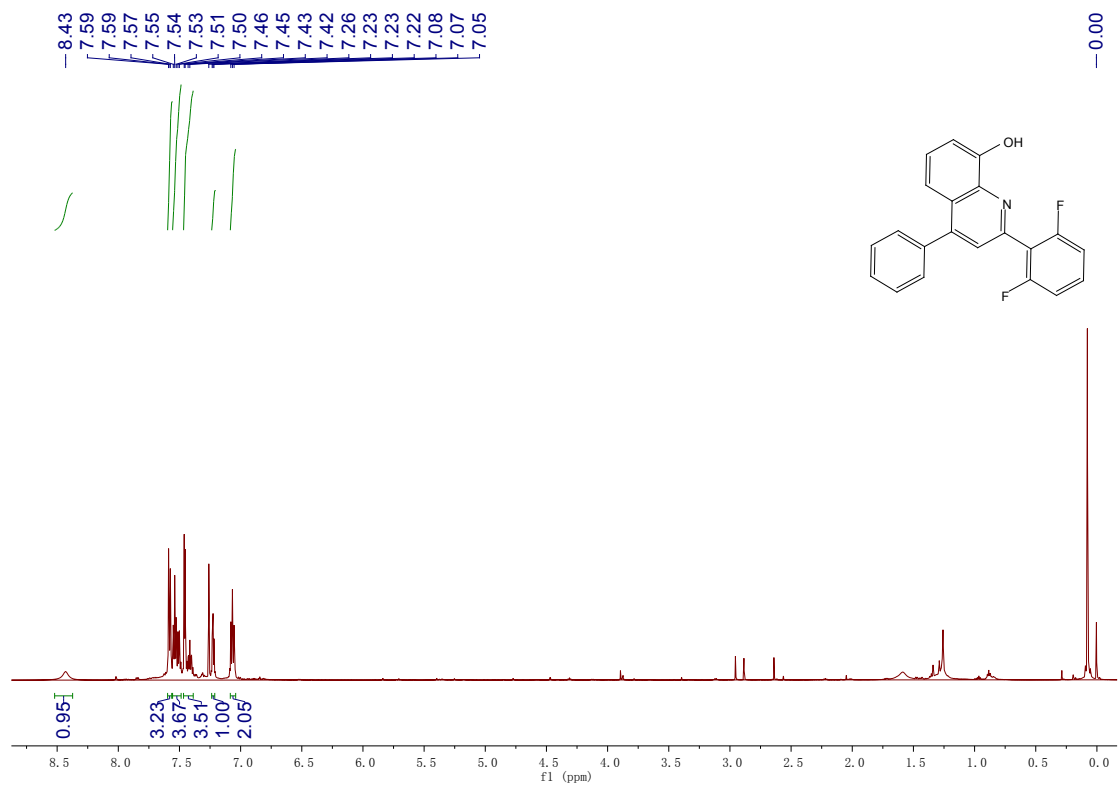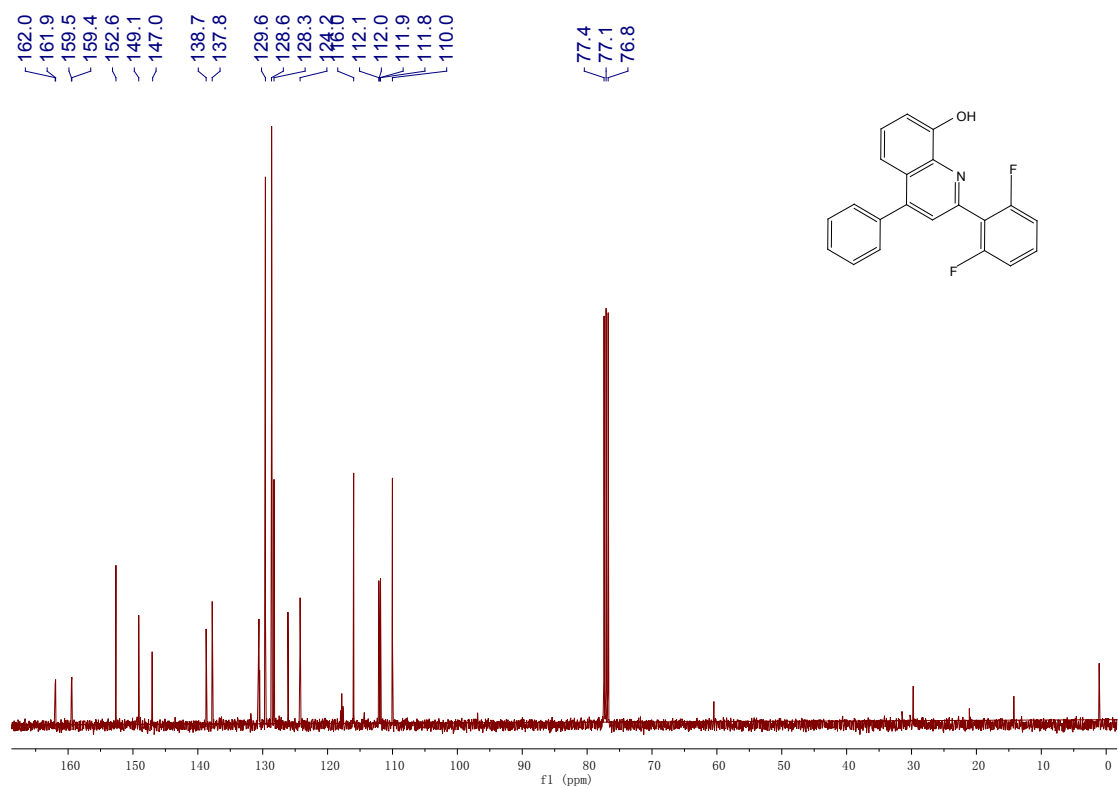

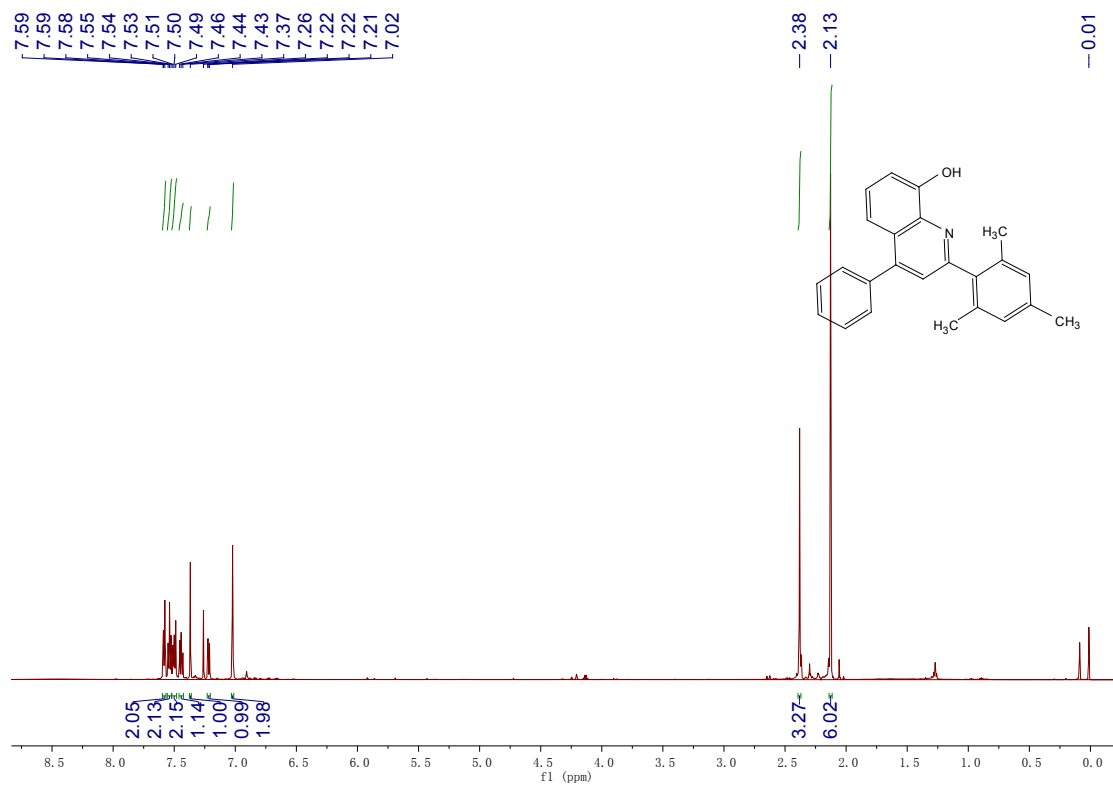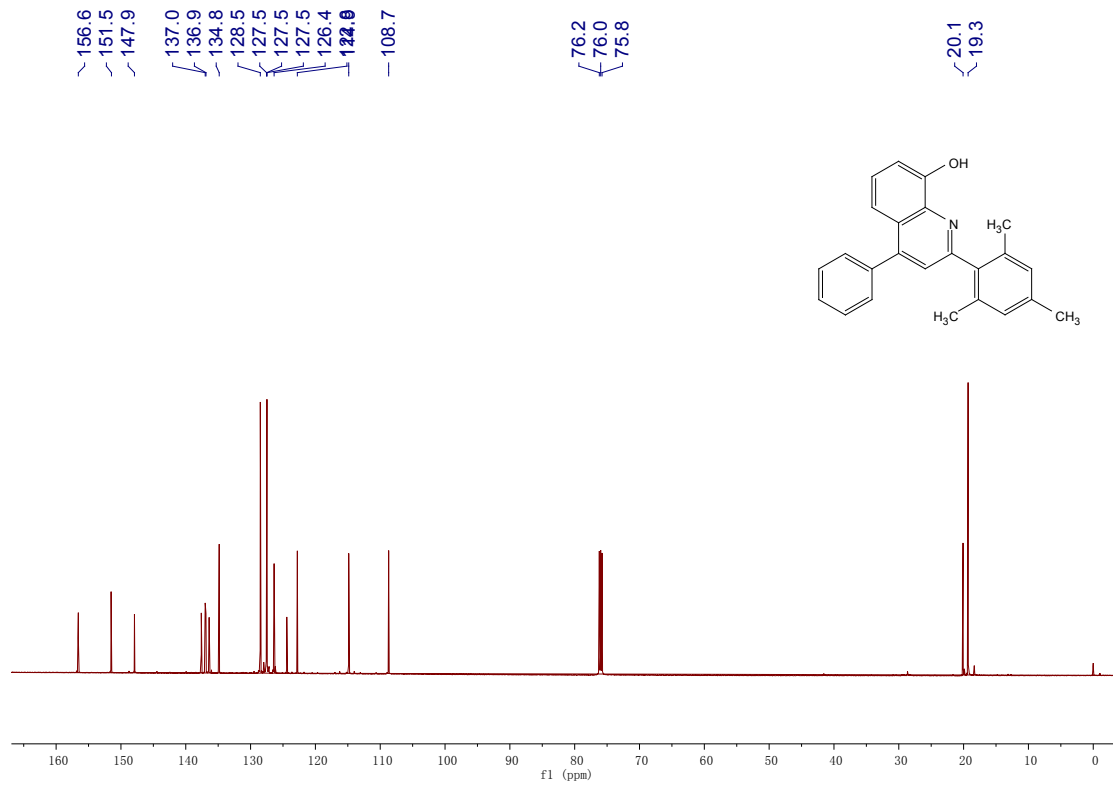

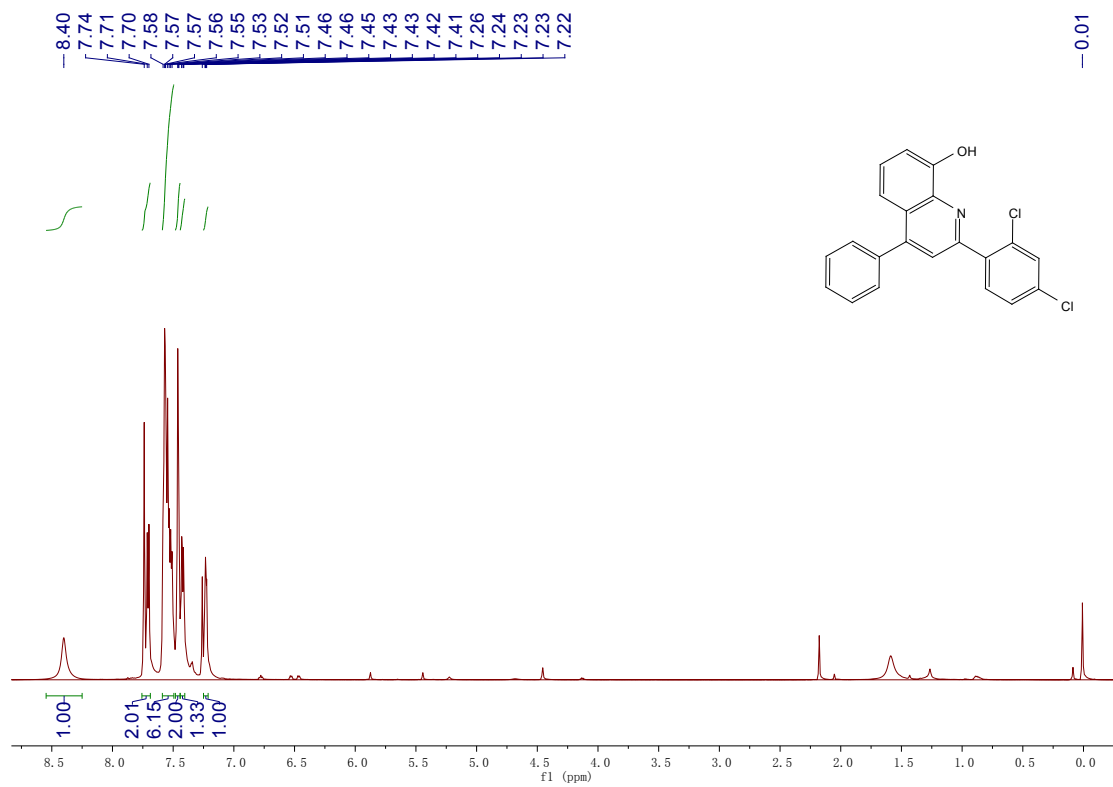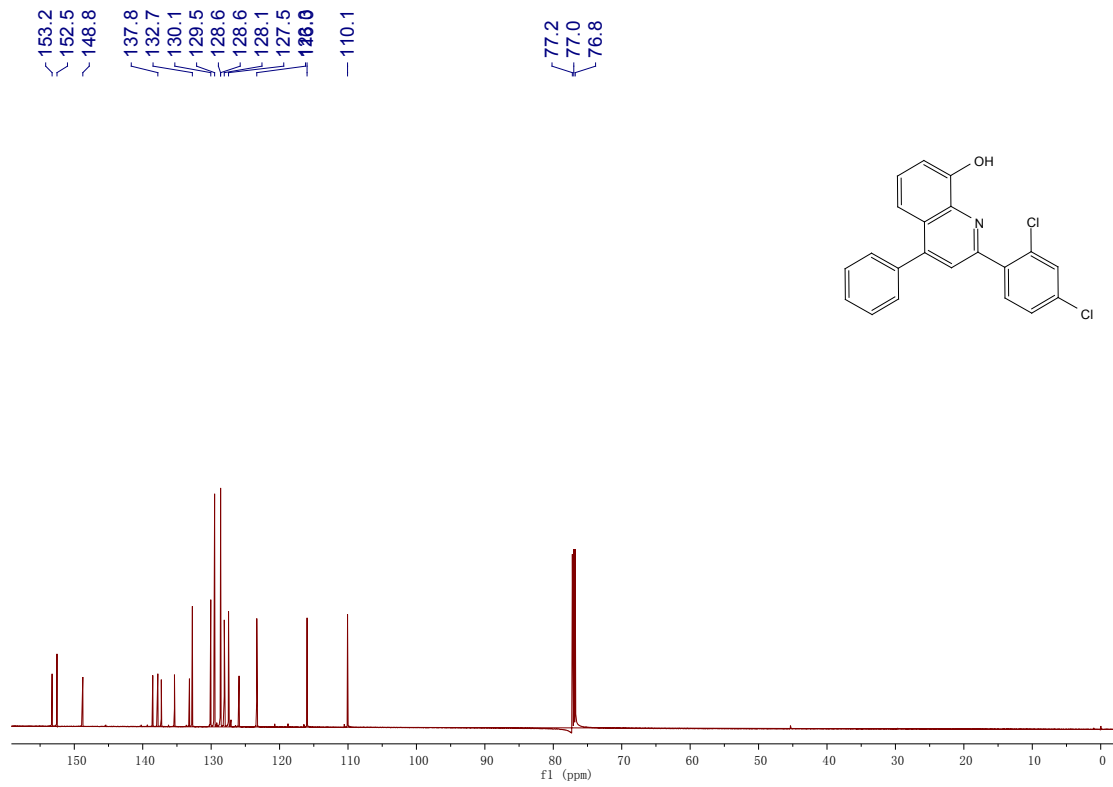

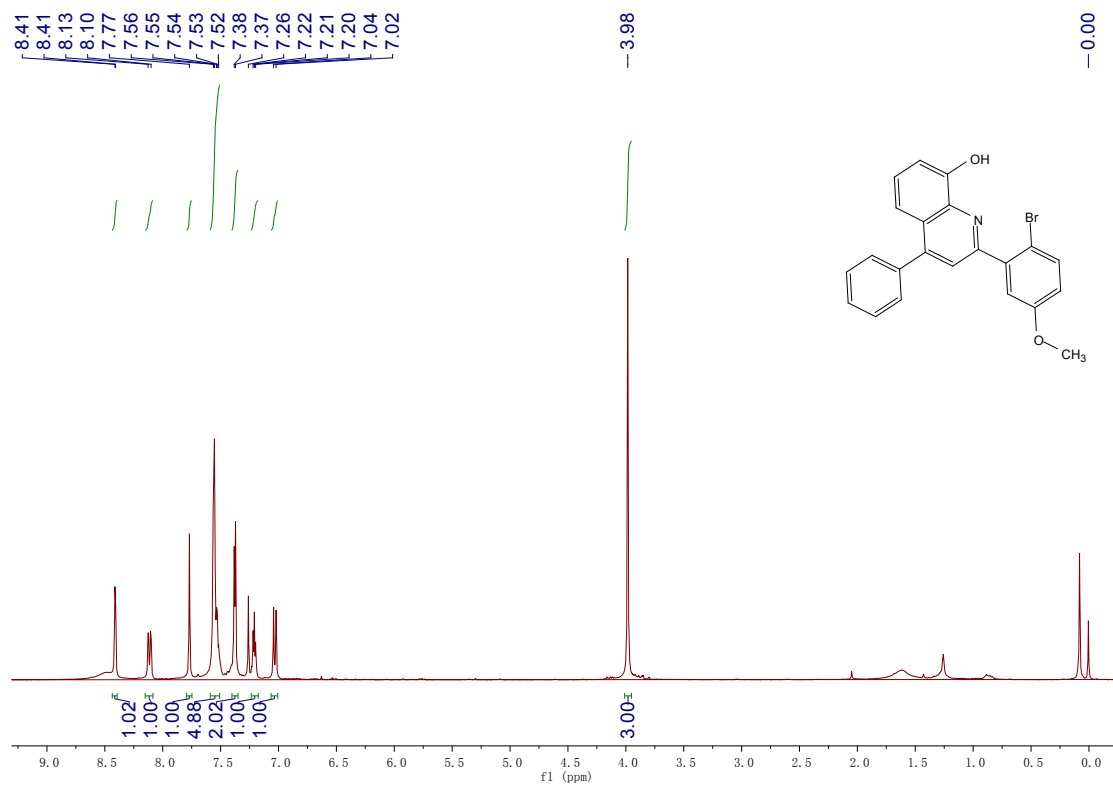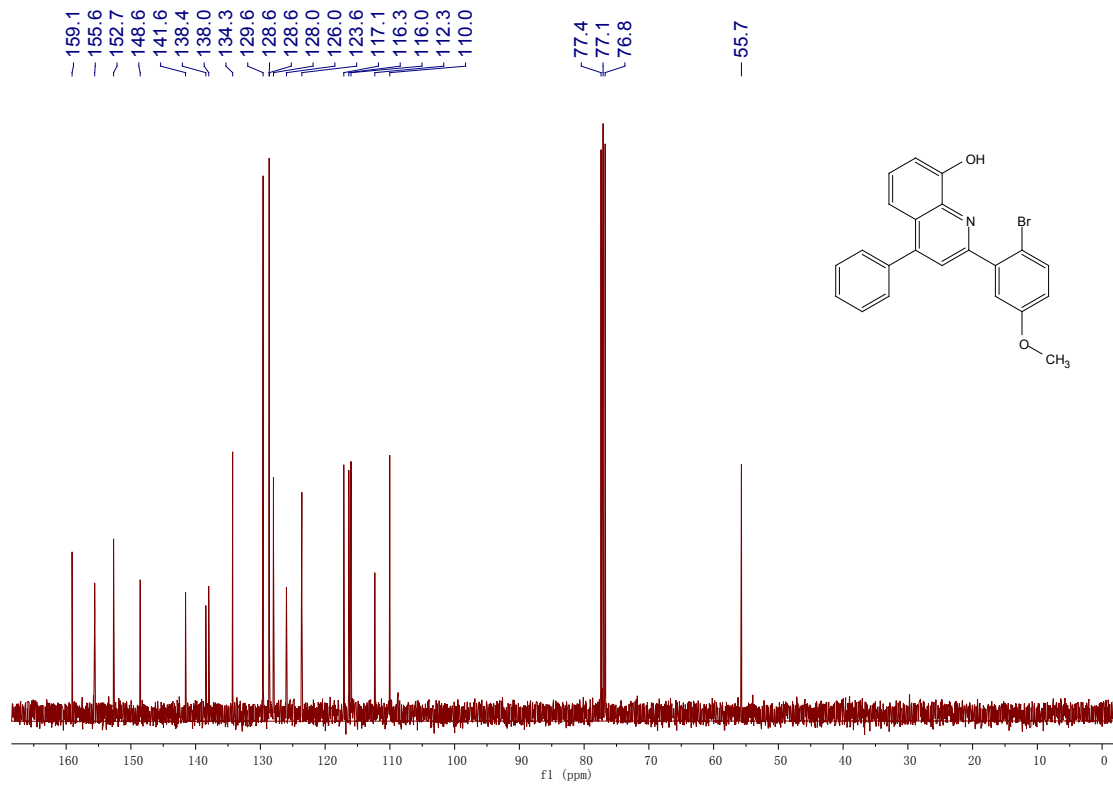

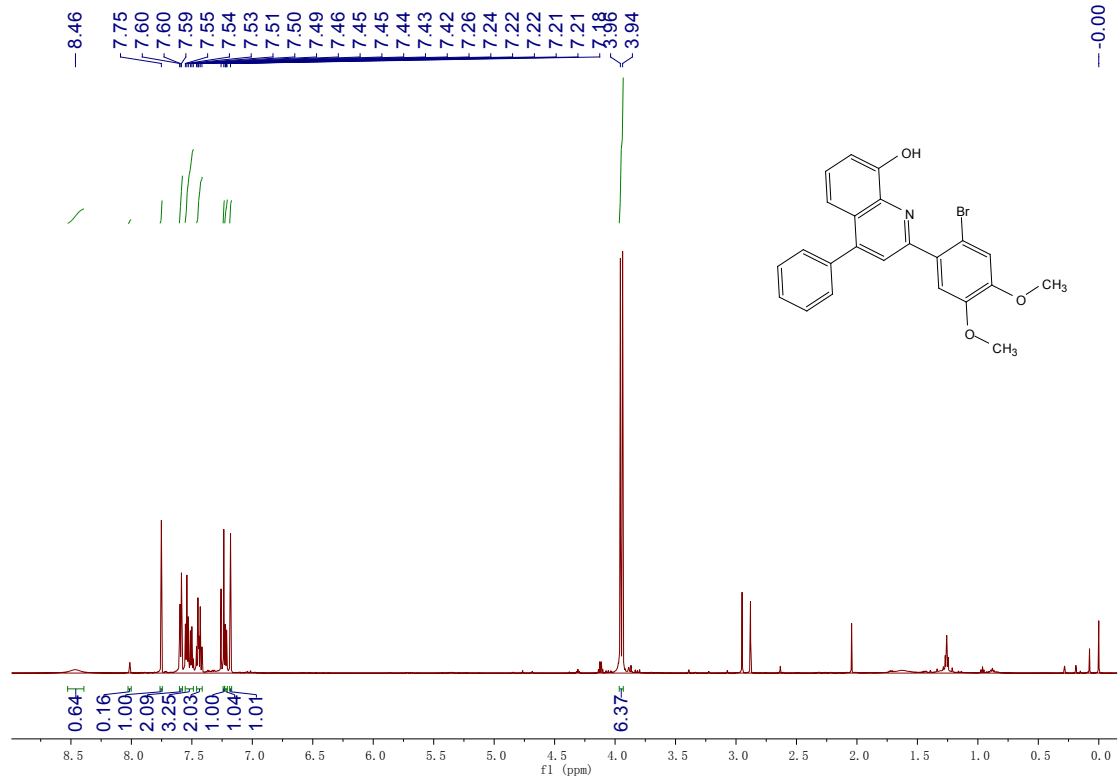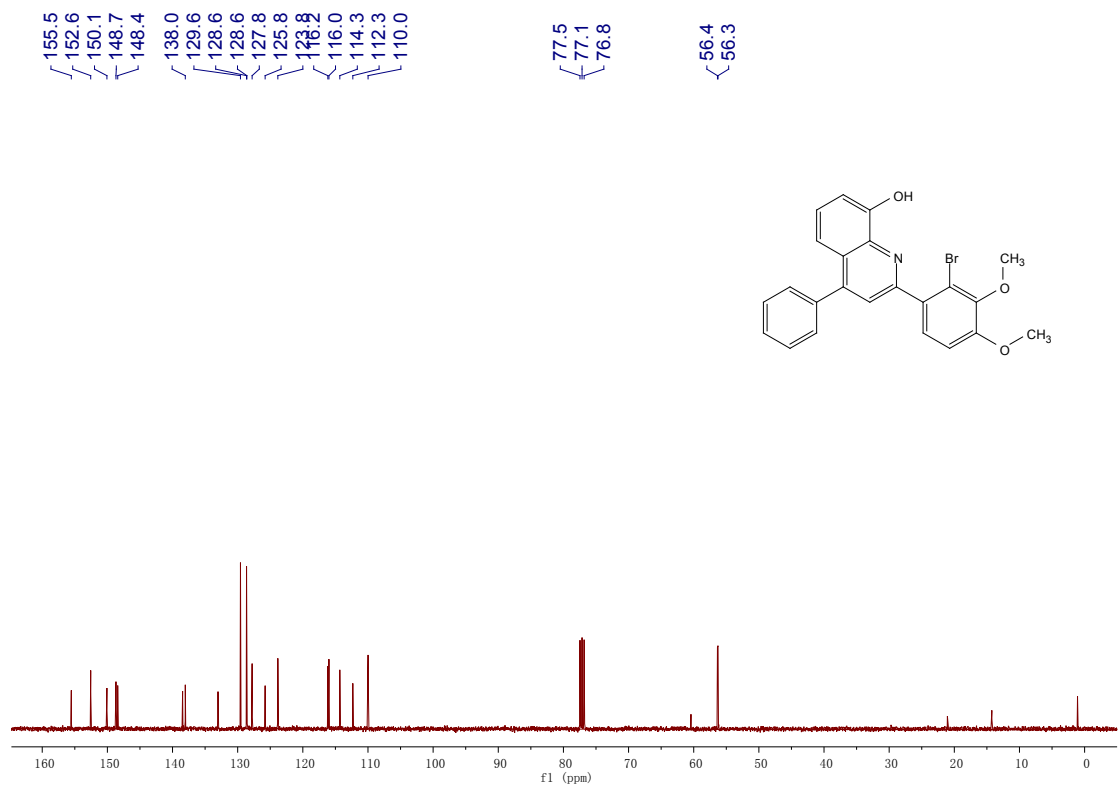

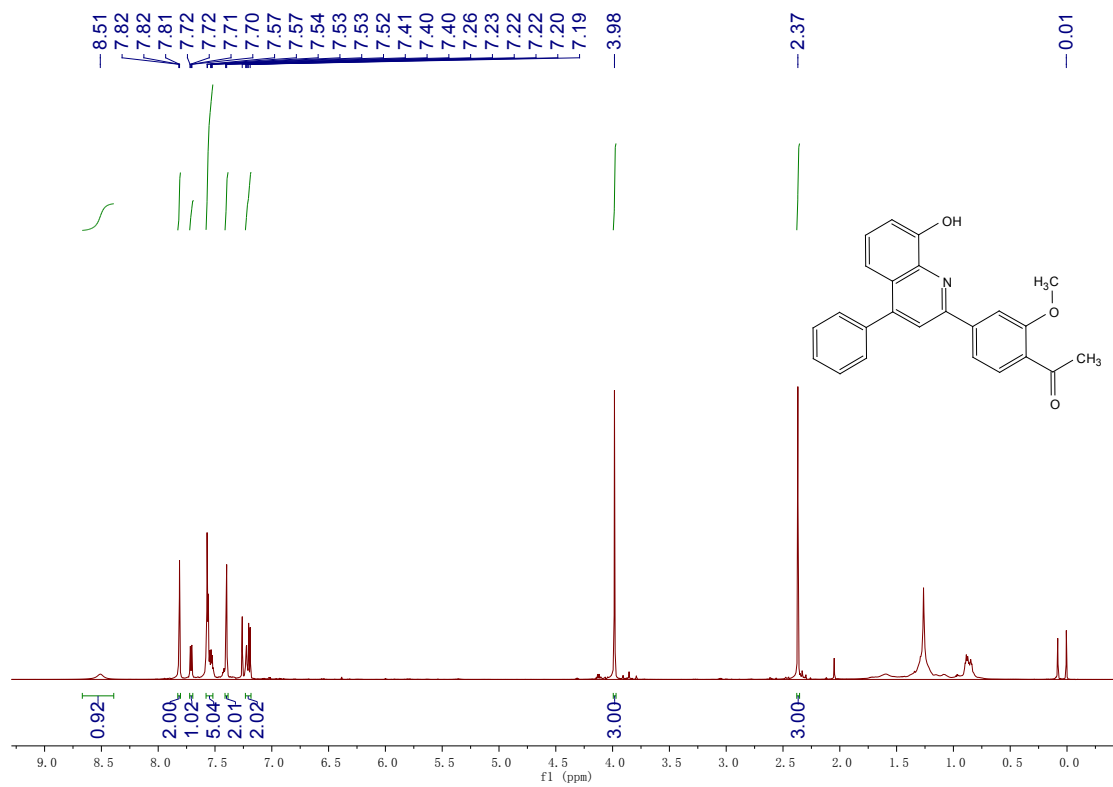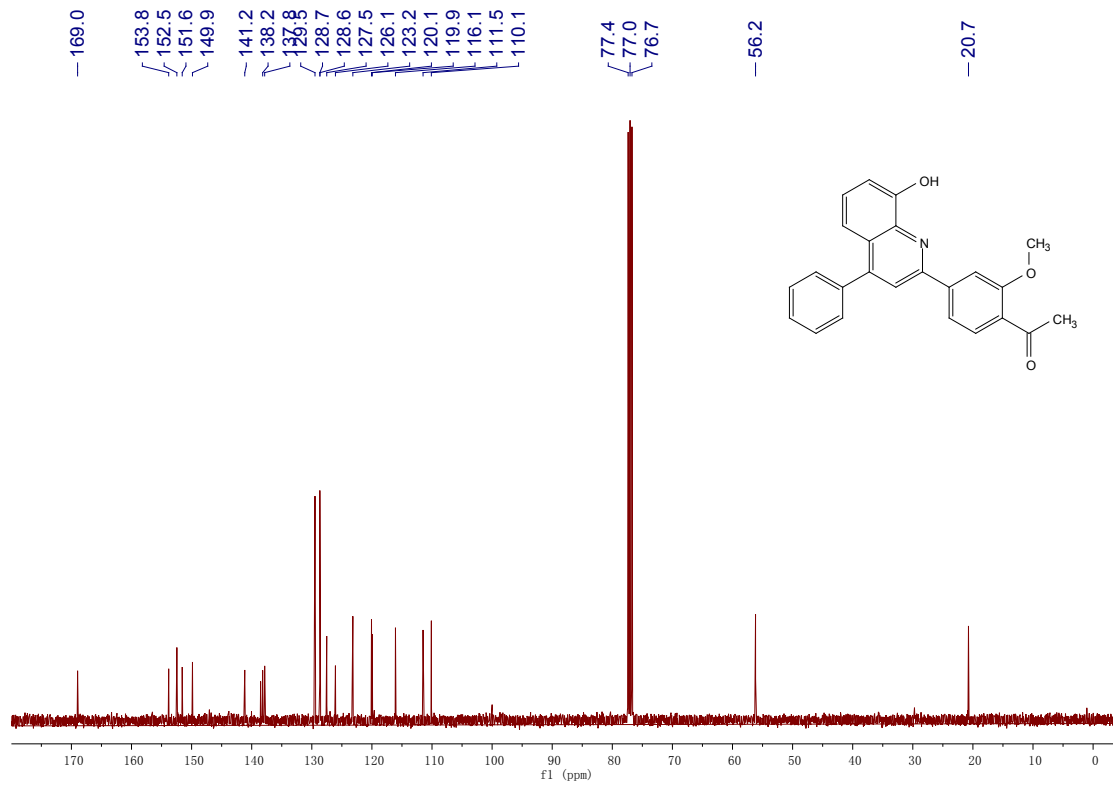

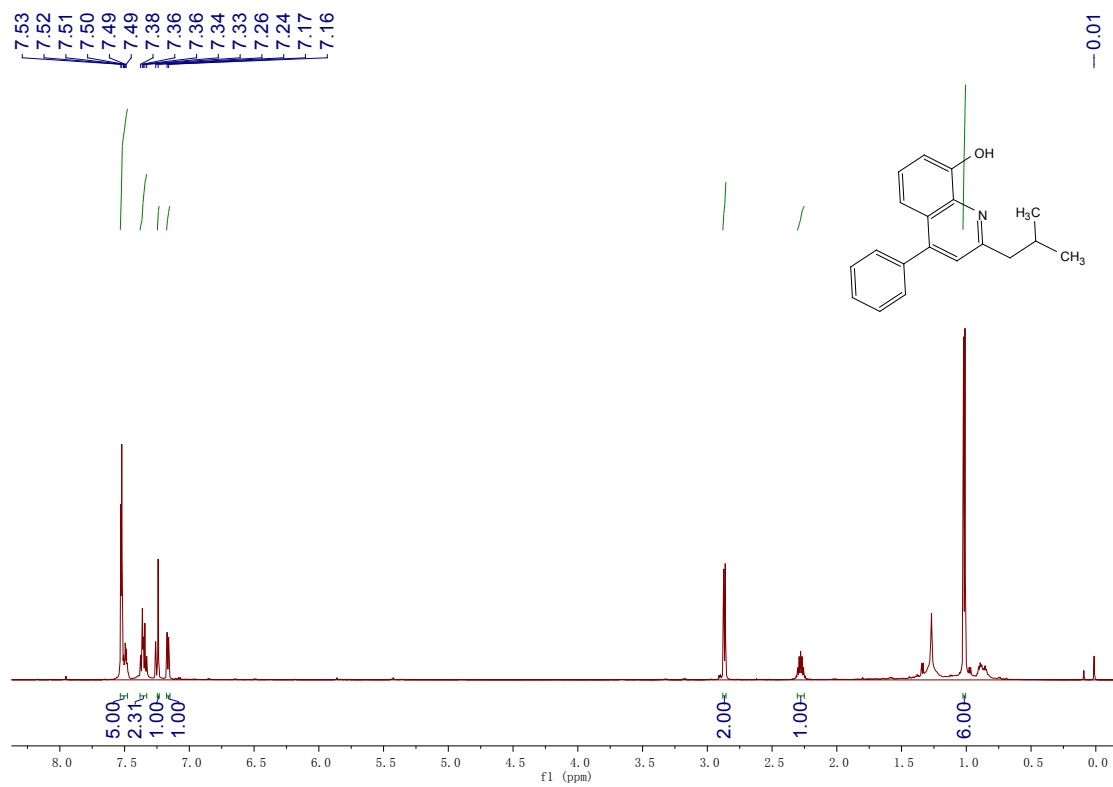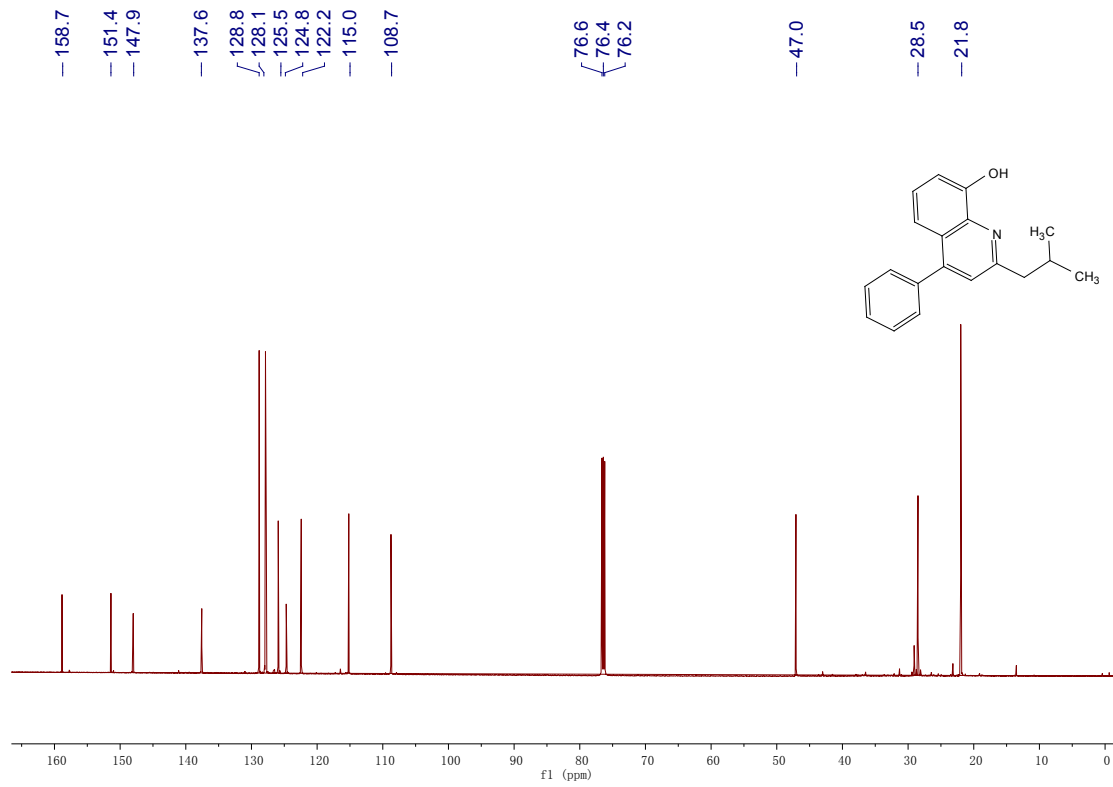



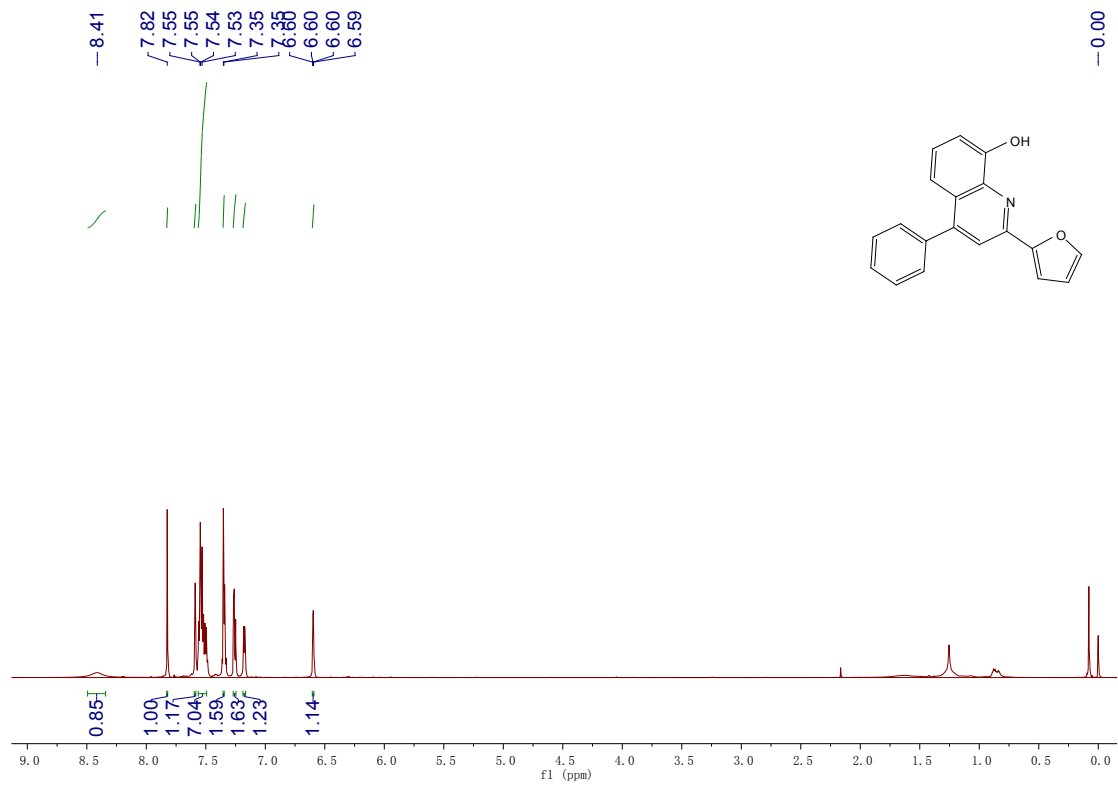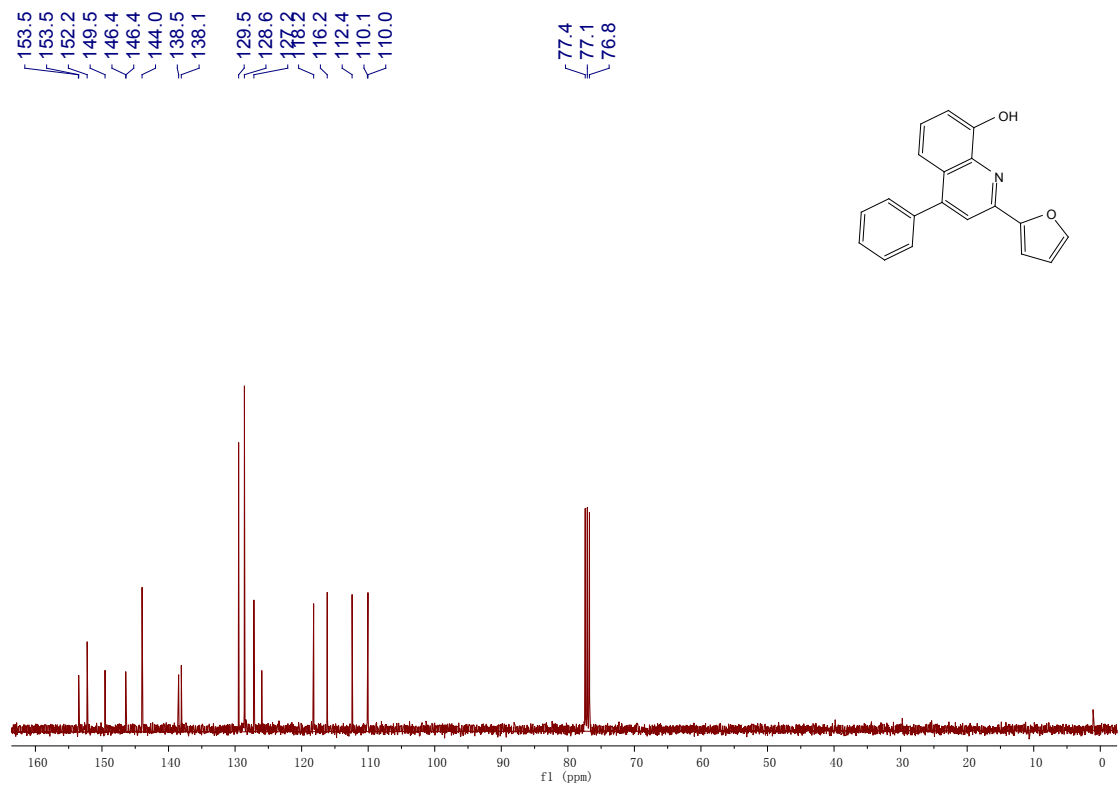

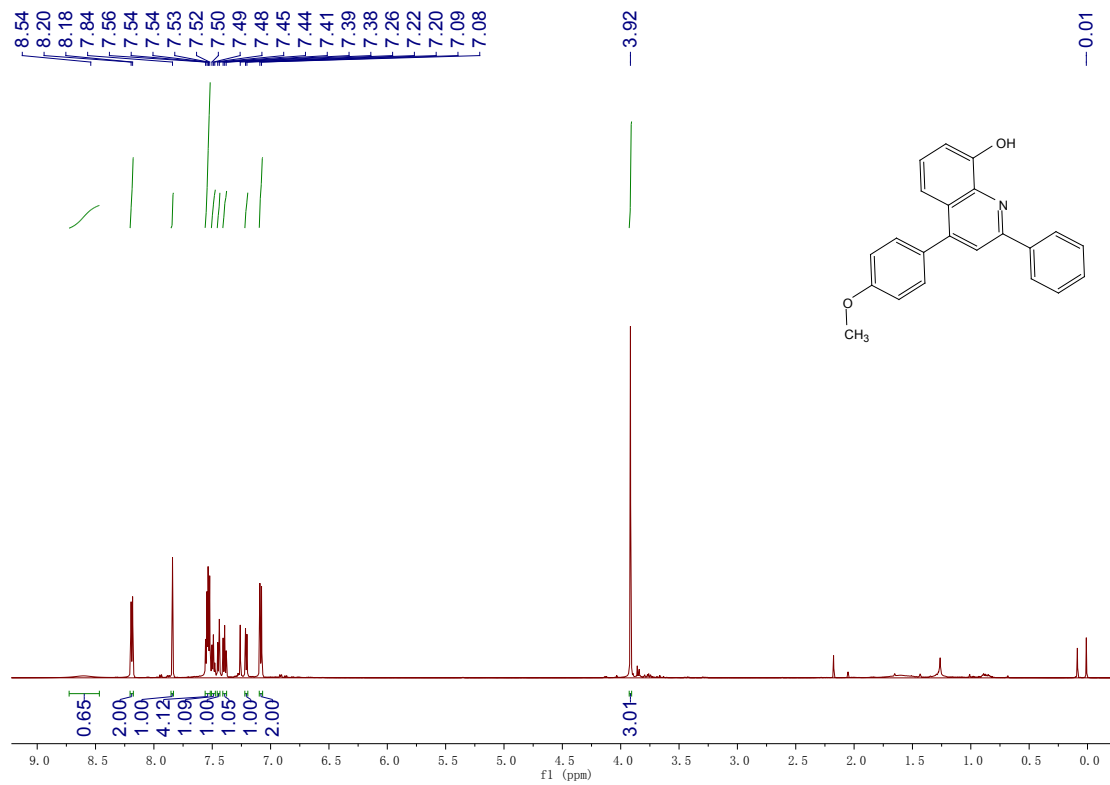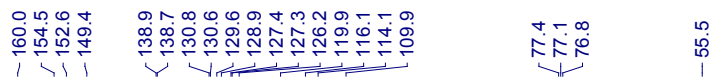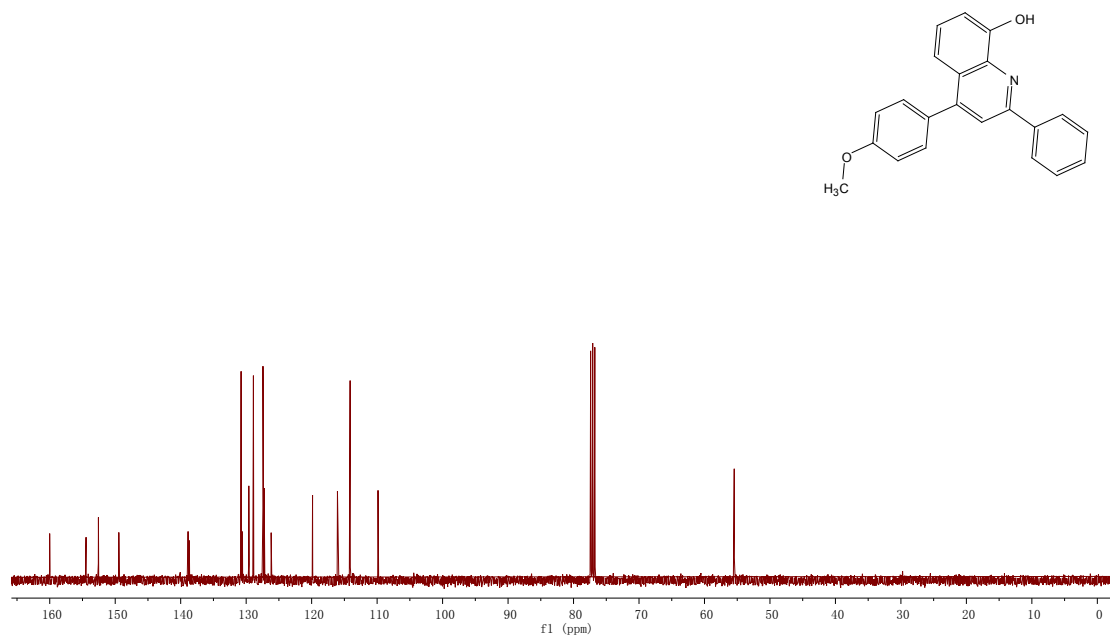

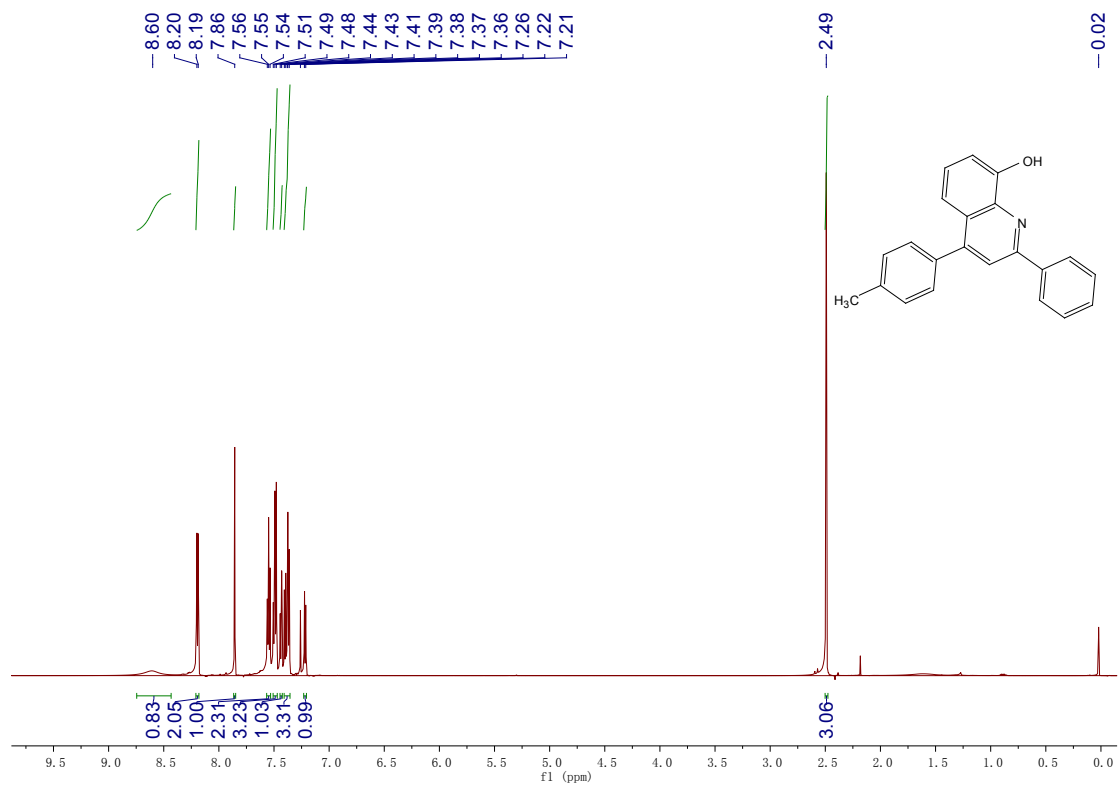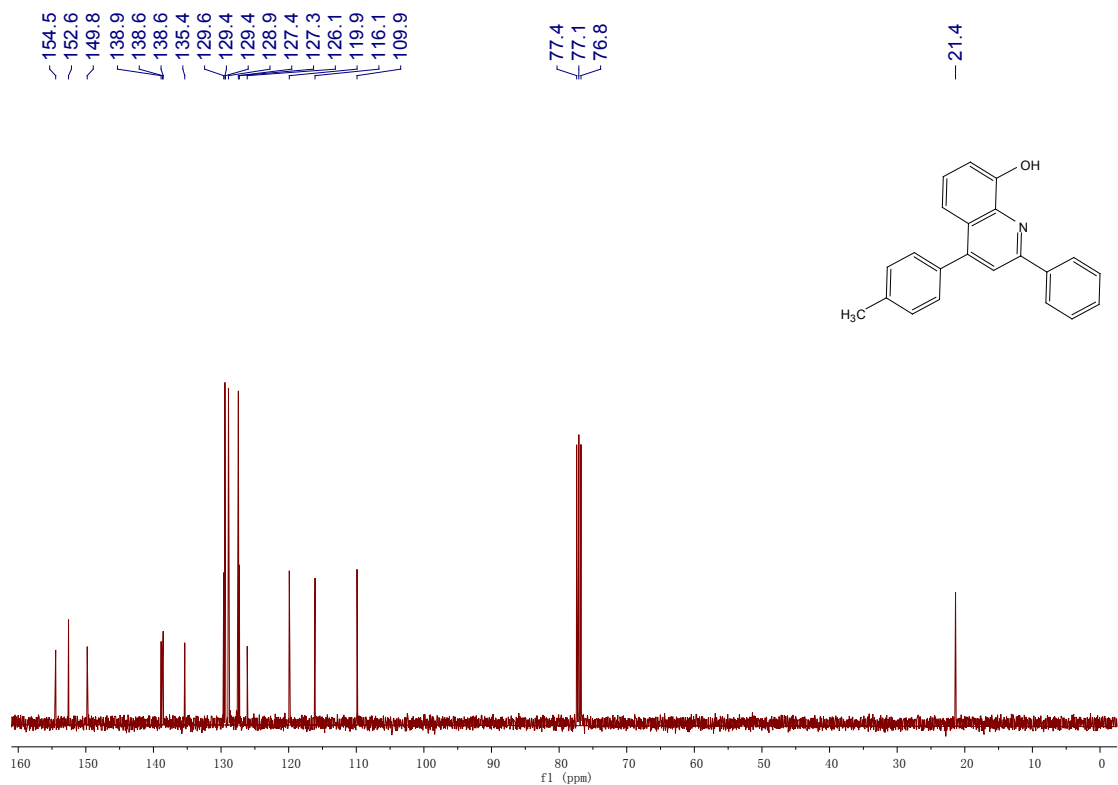

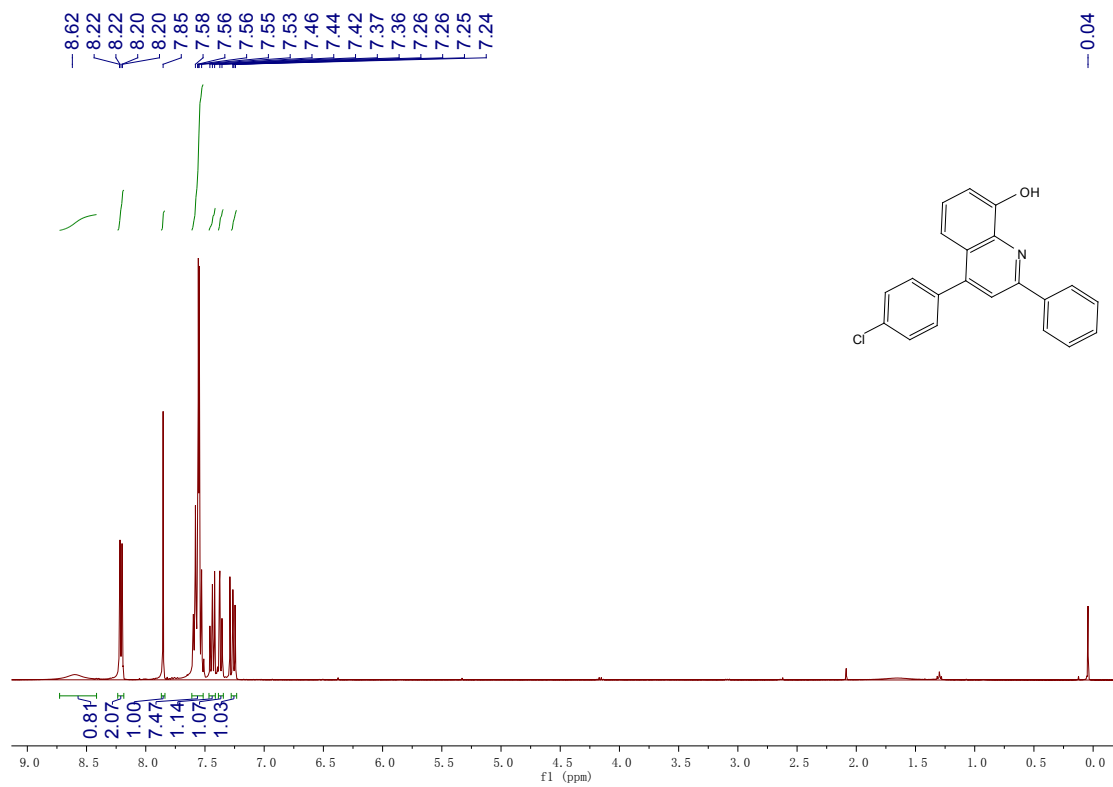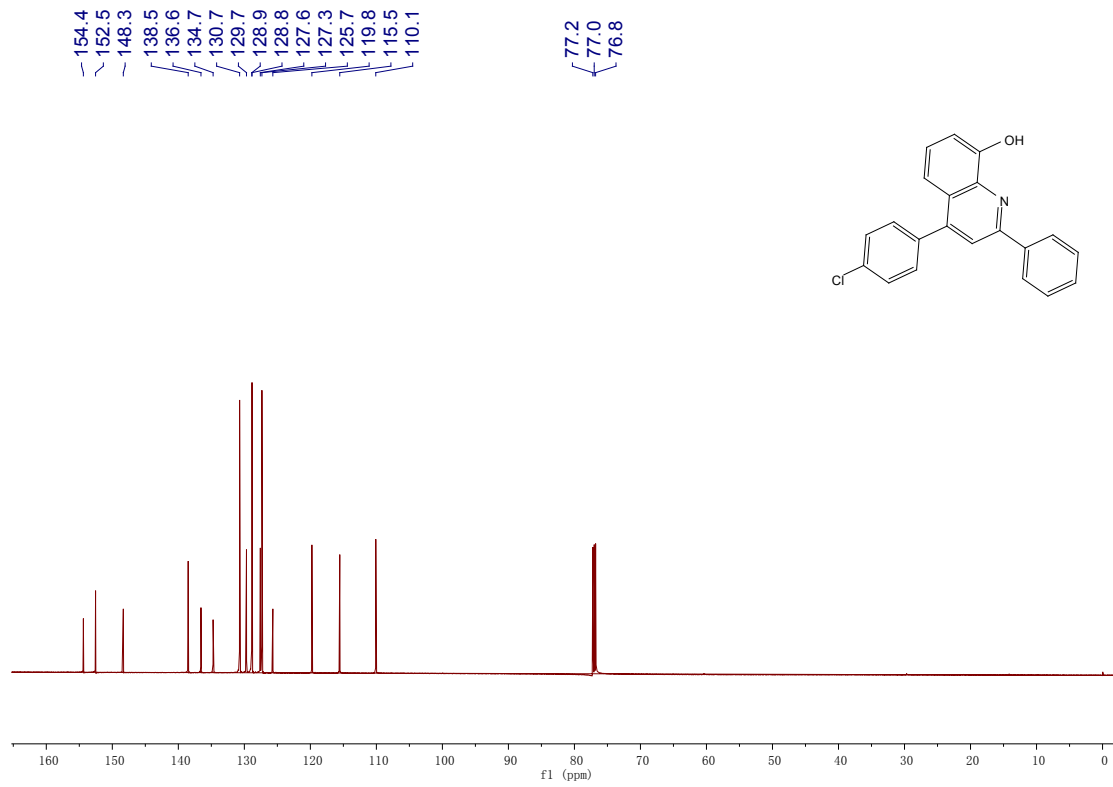

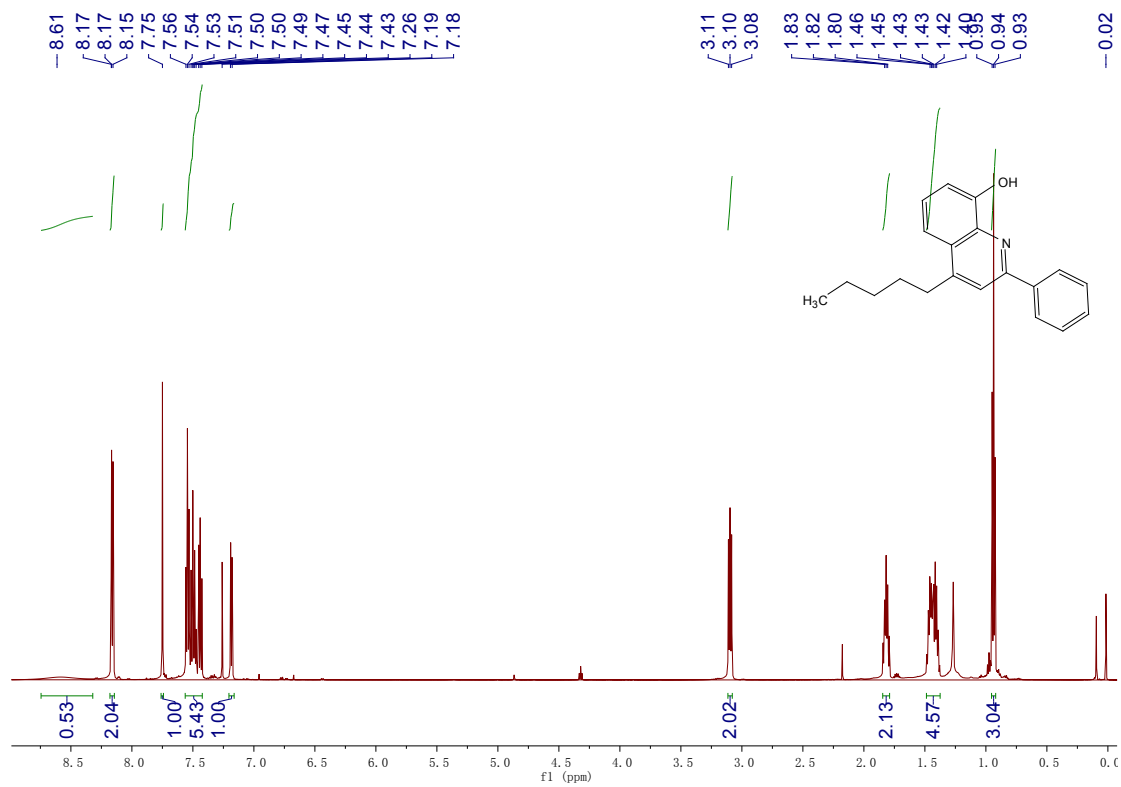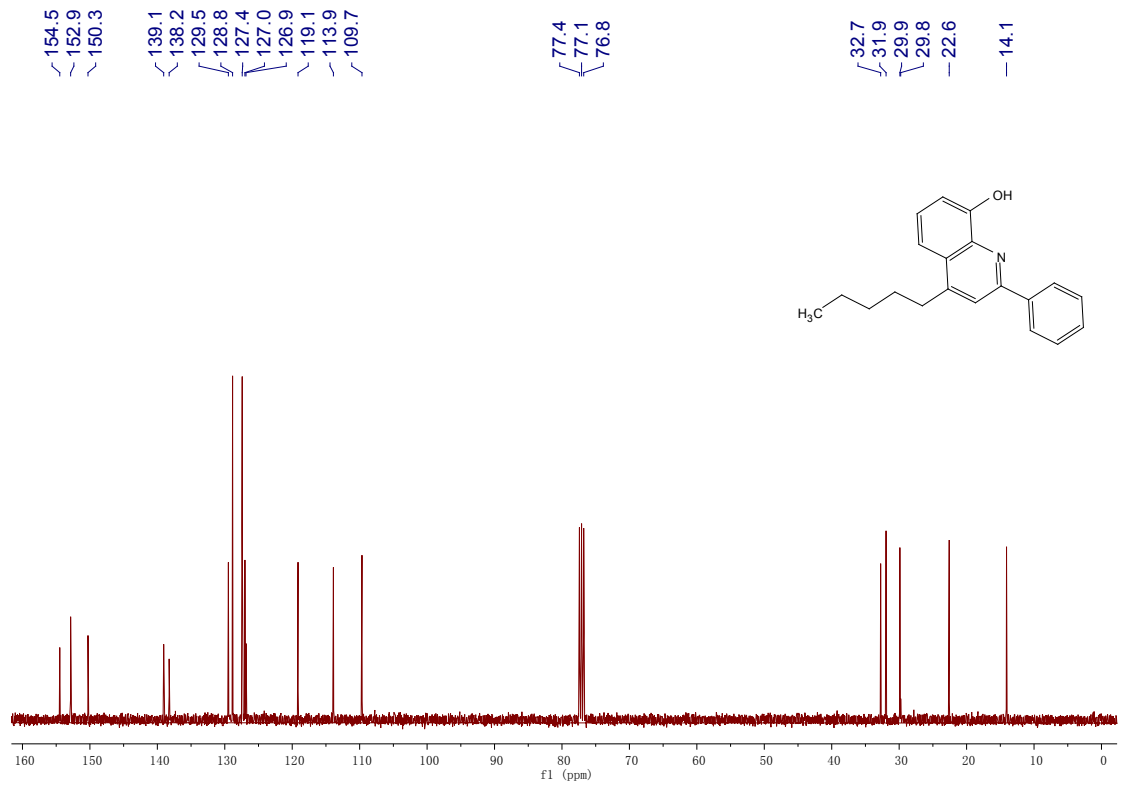

Supplement: c8ra07212d1.pdf [file c8ra07212d1.pdf]
